# Supplementary material for: An Evolutionary Conservation and Druggability Analysis of Enzymes Belonging to the Bacterial Shikimate Pathway
Source: MDPI journal article supplement (doi:10.3390/antibiotics11050675), 2022-05-17
Supplement: s1 [file s1]

## SUPPORTING INFORMATION

for

### Evolutionary Conservation and Druggability Analysis of Enzymes Belonging to the Bacterial Shikimate Pathway

Rok Frlan\*

**Corresponding author address:** University of Ljubljana, Faculty of Pharmacy, 1000

Ljubljana, Tel: +386 1 4769 674, e-mail: rok.frlan@ffa.uni-lj.si

|                                                                                         |     |
|-----------------------------------------------------------------------------------------|-----|
| <b>1. General data</b>                                                                  | S2  |
| <b>2. General procedures</b>                                                            | S4  |
| 2.1. Multiple sequence analysis                                                         | S4  |
| 2.2. Comparisons of lengths between isozymes                                            | S5  |
| 2.3. Analysis of druggability                                                           | S5  |
| 2.3.1. Acquisition and preparation of proteins in Maestro                               | S5  |
| 2.3.2. Identification of hotspots and binding sites with FTMap and FTSite               | S5  |
| 2.3.3. Identification of binding sites and the assessment of druggability using SiteMap | S6  |
| 2.4. Generation of figures of heatmaps and binding sites                                | S6  |
| <b>2. Experimental Data</b>                                                             | S6  |
| 2.1. Multiple sequence analysis                                                         | S6  |
| 2.2. DAHP synthase                                                                      | S7  |
| 2.2.1. Length analysis                                                                  | S7  |
| 2.2.2. Conservation analysis by ConSurf                                                 | S7  |
| 2.2.3. Heatmaps and binding sites detected by FTMap and SiteMap                         | S8  |
| 2.3. DHQS                                                                               | S8  |
| 2.3.1. Conservation analysis by ConSurf                                                 | S8  |
| 2.3.2. Heatmaps and binding sites detected by FTMap and SiteMap                         | S9  |
| 2.4. DHQase                                                                             | S10 |
| 2.4.1. Length analysis                                                                  | S10 |
| 2.4.2. Type I                                                                           | S10 |

|                                                                      |     |
|----------------------------------------------------------------------|-----|
| 2.4.3. Type II.....                                                  | S12 |
| 2.5. SDH.....                                                        | S13 |
| 2.5.1. Conservation analysis by ConSurf .....                        | S13 |
| 2.5.2. Heatmaps and binding sites detected by FTMap and Sitemap..... | S14 |
| 2.6. SK .....                                                        | S15 |
| 2.6.1. Analysis of length .....                                      | S15 |
| 2.6.2. Conservation analysis by ConSurf .....                        | S15 |
| 2.6.3. Heatmaps and binding sites detected by FTMap and Sitemap..... | S16 |
| 2.6.4. Conservation analysis by ConSurf .....                        | S17 |
| 2.6.5. Heatmaps and binding sites detected by FTMap and Sitemap..... | S18 |
| 2.7. EPSPS.....                                                      | S18 |
| 2.7.1. Conservation analysis by ConSurf .....                        | S18 |
| 2.7.2. Heatmaps and binding sites detected by FTMap and Sitemap..... | S19 |
| 2.8. CS.....                                                         | S20 |
| 2.8.1. Conservation analysis by ConSurf .....                        | S20 |
| 2.8.2. Heatmaps and binding site analysis.....                       | S21 |
| 2.9. Druggability analyses.....                                      | S23 |
| 2.9.1. Data .....                                                    | S23 |
| 2.9.2. Graphical representation of druggability analyses .....       | S31 |
| 2.10. Analyses of physicochemical properties.....                    | S33 |
| 3. References .....                                                  | S34 |

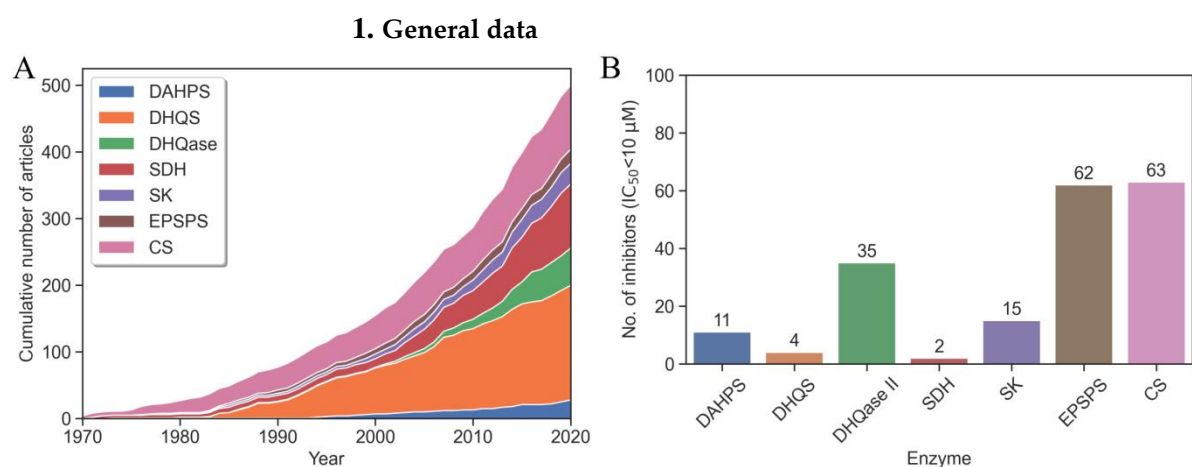

**Figure S1.** The number of inhibitors of the shikimate pathway enzymes. (a) a cumulative number of articles on shikimate pathway inhibitors per each enzyme published from 1970-2020; (b) The number of low micro and submicromolar inhibitors of each enzyme. Enzyme abbreviations: 3-deoxy-*D*-arabino-heptulosonate-7-

phosphate-synthase (DAHPS), 3-dehydroquinate (DHQ) synthase (DHQS), 3-dehydroquinate dehydratase (DHQase), shikimate 5-dehydrogenase (SDH), shikimate kinase (SK), 5-enolpyruvylshikimate-3-phosphate (EPSP) synthase (EPSPS), chorismate synthase (CS).

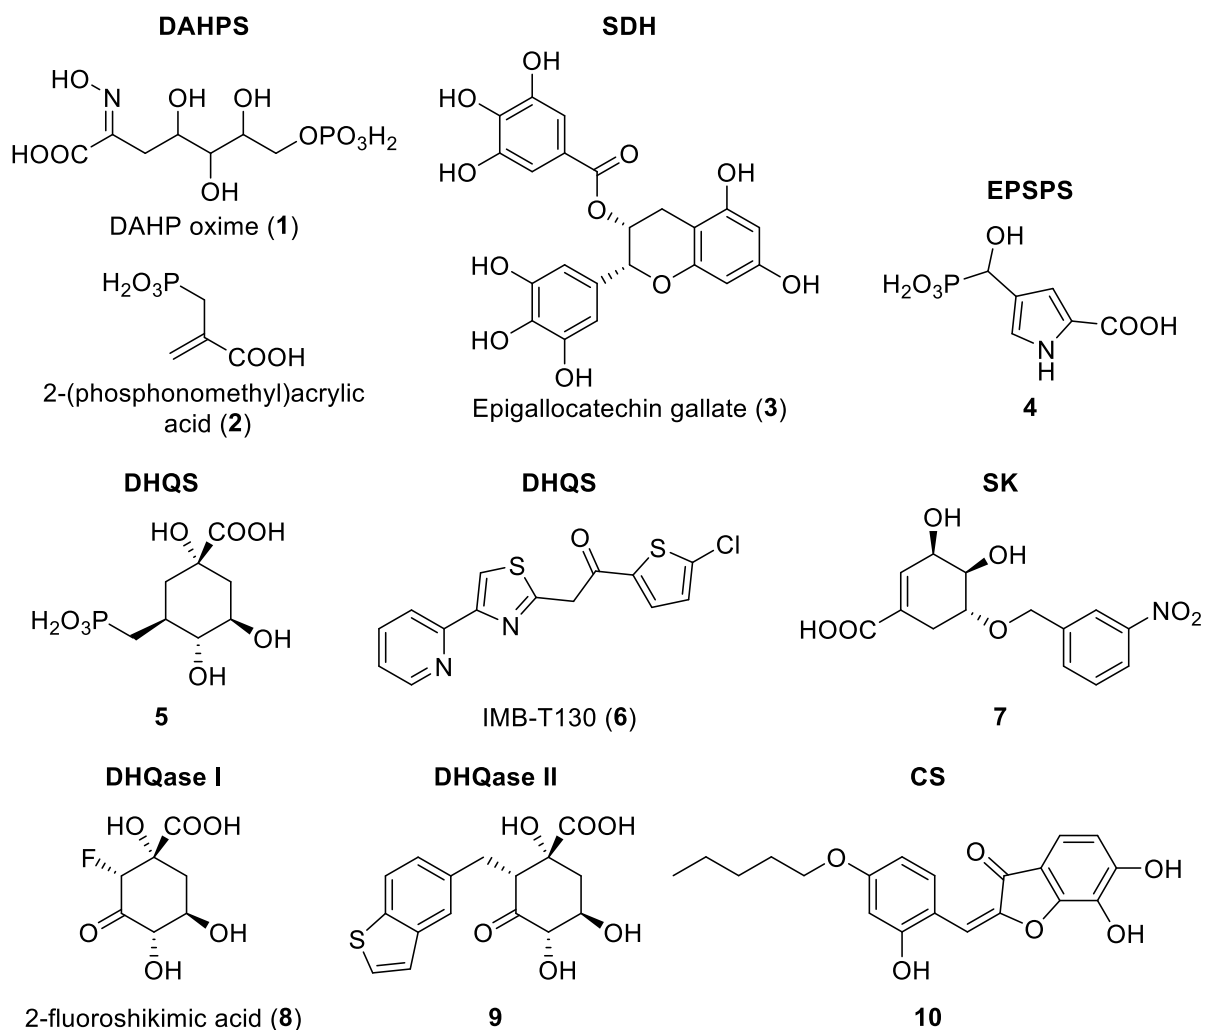

**Figure S2.** Inhibitors 1-10 of bacterial enzymes belonging to the shikimate pathway [1-11].

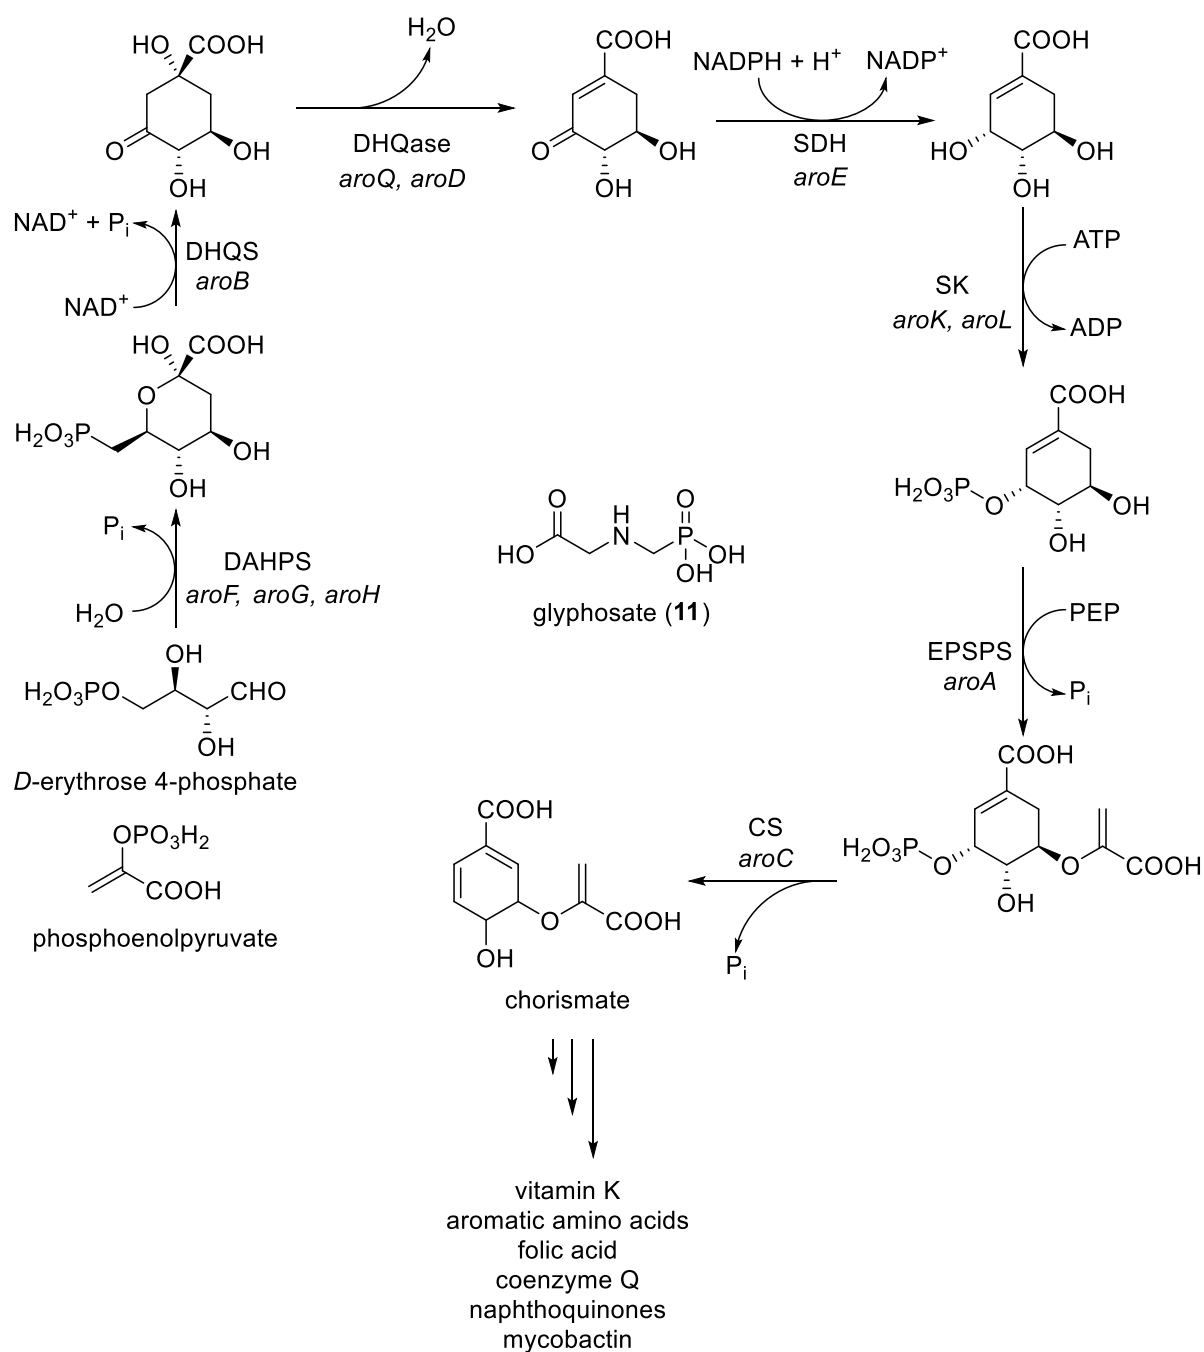

**Figure S3.** Biosynthetic steps of the shikimate metabolic pathway [12–16].

## 2. General procedures

### 2.1. Multiple sequence analysis

The three enzymes in this pathway, namely DAHPS, DHQase, and SK, each exist in at least two isoforms that differ in their physicochemical properties, amino acid sequences, quaternary structures, and molecular mass. Details of the exact length of each isoform can be found in Table S2, Figure S4, and Figure S5. DAHPS are classified into three major groups: Type Ia, Type Ib, or Type II. Although there is less than 10% sequence identity between type I and type II classes [17–22], both types share a common 3D structure. Because 14% of the analyzed genomes harbored both isoforms, both sequences

were used in the MSA. DHQases are also divided into two groups, type I and type II, showing no clear similarity in amino acid sequence [23,24] and little similarity in the three-dimensional structures of both enzyme families, as evidenced by a large average root mean square deviation (RMSD =  $11.47 \pm 1.10\text{\AA}$ ) of the superimposed crystal structures. In contrast, there is a large structural similarity within both families with an RMSD of  $0.67 \pm 0.21\text{\AA}$  and  $0.61 \pm 0.09\text{\AA}$  for families I and II, respectively. Because of these large differences, the two families were analyzed separately as single units. SKs are divided into two groups: type I and type II. SK II is the dominant enzyme that has a hundredfold higher affinity ( $K_M=200\mu\text{M}$ ) for shikimate than the enzyme SK I ( $K_M = 20\text{ mM}$ ). In 20% of pathogenic bacterial species, for example in *E. coli*, *K. pneumoniae*, *Streptococcus sp.* and *Y. pestis*, both isozymes are present. The role of SK I is not yet clear, but it has been suggested that it has an alternative biological function related to sensitivity to the antibiotic mecillinam [25]. Therefore, only SK II was used for further analysis.

## 2.2. Comparisons of lengths between isozymes

Protein sequences of individual enzymes from all species were downloaded from the UniProt database [26]. Outliers that had only 60% residues compared with the average length of the protein family were filtered out and then a unique representative was selected for each human pathogenic bacterium. A list of the number of human pathogenic microorganisms was obtained from the Kyoto Encyclopaedia of Genes and Genomes [27]. A comparison of protein lengths between the isozymes of DAHPS, DHQase, and SK as measured by the number of amino acids is shown in Table S2, Figure S4, and Figure S5.

## 2.3. Analysis of druggability

### 2.3.1. Acquisition and preparation of proteins in Maestro

Selected 3D structures were imported from the Protein Data Bank into Maestro [28]. To prevent regions between protein monomers from forming unphysical sites that give good results but exist only in the crystal lattice and not in solution, only one monomer chain was retained, usually chain A. Structures were first aligned using Protein Structure Alignment and then prepared using Protein Preparation Wizard both implemented in the Schrödinger Suite [28]. In each structure, ligands, water, and other co-crystallized molecules were removed except for the Mg cofactor if present. Bond orders were automatically assigned, hydrogens were added, selenomethionines were converted to methionines, missing side chains were added, ligands were removed, disulfide bridges were created when possible, water beyond  $5\text{\AA}$  radius of heteroatoms was added, and heteroatoms were protonated at pH 7.0. The *imprsd* script was used to perform constrained minimization of the protein with a maximum root mean square deviation (RMSD) of  $0.30\text{\AA}$ .

### 1.3.2. Identification of hotspots and binding sites with FTMap and FTSite

Representative PDB structures were uploaded to the FTMap and FTSite [29] servers for mapping. Subsequently, the results were downloaded as a Pymol [30] session file(.pse) for graphical representation and further analysis. Amino acids within  $4\text{\AA}$  of each cluster were selected and exported in pdb format. PDBest [31], a freely available platform for biomolecule manipulation, filtering, and normalization was used to extract residue numbers that were further

processed using KNIME [32]. Typical examples of analyses for one representative bacteria per enzyme are provided in Tables S3-S29.

### 1.3.3. Identification of binding sites and the assessment of druggability using SiteMap

All protein structures were first prepared according to the procedure described above. Then SiteMap [33], the binding site identification software, was applied to all selected enzymes. The potential binding sites with the highest score were identified. Sites were retained if they comprised at least 15 site points per reported site. The narrower definition of hydrophobicity was used along with a fine grid (0.35 Å). Site maps that were 4Å or more from the nearest site points were truncated. Upon completion, the results were downloaded as csv file and then further analyzed using KNIME [32], extracting physicochemical property data and residue numbers for further processing. The graphical representations of the physicochemical properties, shown in Figures 6 and 7 were generated from data in Table S30.

### 1.4. Generation of figures of heatmaps and binding sites

Graphical representation of the three-dimensional structures of proteins with heatmaps and binding sites mapped onto the protein structure generated by FTMap and FTSite server [29] was performed using Pymol [30]. All session files downloaded from FTMap and FTSite server [29] were combined into a common session file. The structures of each enzyme were first aligned using the align command in PyMol. The three highest-rank heatmaps and binding sites were selected and then plotted as a surface representation on a representative X-ray structure and presented in Figures S6 and S7. A graphical representation of the SiteMap results was performed in Maestro. The results of the analyses for six representative structures per enzyme were superimposed and then two sites with the highest rank by DScore were selected and plotted on a representative X-ray structure shown in Figures S6 and S7.

Boxplots were generated using the Seaborn [34] and Matplotlib [35] libraries in the Jupyter notebook [36].

## 2. Experimental Data

### 2.1. Multiple sequence analysis

**Table S1.** Sequences that were extracted from UniProt database.

| Enzyme | Total number | Bacteria (%) | Fungi (%) | Plants (%) | Other (%) <sup>1</sup> | Analyzed <sup>2</sup> |
|--------|--------------|--------------|-----------|------------|------------------------|-----------------------|
| DAHPS  | 52205        | 89.0         | 6.8       | 2.5        | 1.7                    | 240                   |
| DHQS   | 39880        | 93.1         | 2.8       | 0.2        | 3.9                    | 204                   |
| DHQase | 45628        | 87.7         | 6.9       | 2.0        | 3.4                    | 223                   |
| SDH    | 68219        | 91.4         | 4.8       | 1.5        | 2.3                    | 205                   |
| SK     | 45865        | 89.7         | 4.7       | 2.0        | 3.6                    | 201                   |
| EPSPS  | 37944        | 94.3         | 2.6       | 0.1        | 3.0                    | 209                   |
| CS     | 38794        | 91.0         | 2.8       | 1.3        | 4.9                    | 207                   |

<sup>1</sup> Algae, archaea and apicomplexan parasites, <sup>2</sup> number of sequences from different pathogenic bacteria that were used for the analysis.

## 2.2. DAHP<sub>synthase</sub>

### 2.2.1. Length analysis

**Table S2.** Average length and mass of DAHPS isoforms together with the number of sequences from different pathogenic bacteria found in Uniprot database.

| DAHPS family | Isoform | Sequence length (AA) | Protein mass (kDa) | No. sequences |
|--------------|---------|----------------------|--------------------|---------------|
| Type I       | Aro F   | 355±7                | 39.1±0.7           | 64            |
|              | Aro G   | 353±6                | 38.7±0.6           | 88            |
|              | AroH    | 349±2                | 38.6±0.3           | 29            |
| Type II      | Aro F   | 448±2                | 50.2±0.4           | 2             |
|              | Aro G   | 460±7                | 50.8±0.6           | 31            |
|              | AroH    | 457±10               | 51.1±1.1           | 14            |

### 2.2.2. Conservation analysis by ConSurf

**Table S3.** Highly conserved residues (conservation score 9), conserved residues (conservation score 8), and variable residues (conservation scores 1–3) of DAHPS from *E. coli* (PDB: 1GG1), identified by ConSurf server [37]. Residues in bold print show no variation.

| Residue classification          | Residues                                                                                                                                                                                                                                                                                                                                                                                                                             |
|---------------------------------|--------------------------------------------------------------------------------------------------------------------------------------------------------------------------------------------------------------------------------------------------------------------------------------------------------------------------------------------------------------------------------------------------------------------------------------|
| Highly conserved<br>(Score = 9) | D51, R53, G59, P60, <b>C61</b> , S62, I63, A69, M91, R92, V93, Y94, E96, K97, P98, R99, T100, K105, <b>G106</b> , N109, G122, S158, A161, I162, <b>G163</b> , <b>R165</b> , T166, <b>H172</b> , S177, G184, <b>K186</b> , T189, H207, F209, G216, T223, <b>G225</b> , N226, L233, R234, <b>N240</b> , <b>D265</b> , S267, <b>H268</b> , <b>N270</b> , S271, K273, Q288, G298, M300, <b>E302</b> , S303, G308, Q310, A319, K322, I324 |
| Conserved<br>(Score = 8)        | I46, H64, V90, G103, W104, D110, L129, P139, A141, D155, L156, A164, S169, N187, A196, S211, G236, Y241, Q278, V281, P317, G321                                                                                                                                                                                                                                                                                                      |
| Variable<br>(Score = 1-3)       | D121, G257, S311, D333, D85, K128, A290, V345, E12, D52, K70, C286, D335, A344, K11, I13, K14, E15, L17, E24, K25, F26, E30, N31, N34, A37, H38, K41, K45, K48, N50, V67, T74, A78, E81, H112, N115, F117, P206, W215, G227, E238, K244, A247, E248, E251, G252, N254, P259, D280, A283, Q287, G291, K294, L312, E313, C328, E332, A336, R339, A342, N343                                                                            |

**Table S4.** Amino acids of PEP, E4P and allosteric binding sites of DAHPS from *E. coli* (PDB: 1GG1), with their ConSurf scores and maximum identity.

| PEP binding site |       |                  | E4P binding site |       |                  | Allosteric site |       |                  |
|------------------|-------|------------------|------------------|-------|------------------|-----------------|-------|------------------|
| Residue          | Score | Max identity (%) | Residue          | Score | Max identity (%) | Residue         | Score | Max identity (%) |
| R92              | 9     | 77.5             | K97              | 9     | 99.6             | M147            | 4     | 40.8             |
| Y94              | 9     | 77.5             | P98              | 9     | 99.6             | P150            | 4     | 51.3             |
| K97              | 9     | 99.6             | R99              | 9     | 99.2             | Q151            | 4     | 65.8             |
| G163             | 9     | 100              | T100             | 9     | 77.5             | A154            | 7     | 46.7             |
| A164             | 8     | 77.5             | D326             | 4     | 34.3             | L175            | 7     | 37.1             |
| R165             | 9     | 100              |                  |       |                  | G178            | 4     | 64.6             |
| K186             | 9     | 100              |                  |       |                  | L179            | 7     | 67.1             |
| R234             | 9     | 78.5             |                  |       |                  | S180            | 7     | 64.6             |
| H268             | 9     | 100              |                  |       |                  | S211            | 8     | 52.7             |

### 2.2.3. Heatmaps and binding sites detected by FTMap and Sitemap

**Table S5.** Amino acid residues and the corresponding clusters of DAHPS from *E. coli* (PDB: 1GG1) identified by FTMap and SiteMap.[37] Conserved and highly conserved residues are in bold (scores 8 and 9).

| Heatmaps | Residues                                                                                                  | Site | Residues                                                                                               |
|----------|-----------------------------------------------------------------------------------------------------------|------|--------------------------------------------------------------------------------------------------------|
| F1       | <b>C61, K97, P98, R99</b> , T325, D326                                                                    | S1   | R40, P150, Q151, A154, L175, G178, L179, S180, C181, <b>F209, S211</b> , V212, T213, V221, <b>T223</b> |
| F2       | <b>R92, Y94, K97</b> , E143, <b>A161, G163, A164, R165, K186, R234, H268</b>                              | S2   | <b>R92, Y94, K97, P98, R99, T100</b> , E143, <b>G163, A164, R165, K186, R234, H268</b> , T325, D326    |
| F3       | I148, P150, Q151, E174, L175, A176, <b>S177</b> , G178, L179, <b>F209, S211</b> , V212, V221, <b>T223</b> | S3   | K14, E15, L16, I108, F117, I119, N120, L123, D146, I148, T149, Y152                                    |
| F4       | Q151, A154, G178, L179, S180                                                                              | S4   | <b>I46</b> , L47, G49, <b>D51</b> , D52, <b>R53</b> , L54, P259, Q261, K294, A295, I296, I297          |
| F5       | L23, R127, P150, Q151, Y152, L153, A154, <b>D155</b> , K214                                               | S5   | H44, L47, K48, I200, G227, D228, C229, L258, P259, Q261                                                |
| F6       | I148, P150, Q151, E174, L175, A176, <b>S177</b> , G178, L179, <b>F209, S211</b> , V212, V221, <b>T223</b> | S6   | F95, <b>E96</b> , I108, G142, E143, F144, L145, D146, T149, P150, L153, A154, M157                     |
| F7       | <b>F95, E96, K97, K105, G106</b> , I108, <b>N109</b> , I119, L145, D146, T149                             |      |                                                                                                        |
| F8       | <b>E96</b> , I108, E143, F144, L145, D146, T149, P150, L153, A154                                         |      |                                                                                                        |
| F9       | <b>V93, Y94</b> , F95, <b>E96</b> , G142, E143, F144, L153                                                |      |                                                                                                        |
| F10      | A176, <b>S177</b> , G178, L179, S180, C181, P182, S224, <b>G225, N226</b> , G227, D228                    |      |                                                                                                        |
| F11      | R40, H44, L179, S180, C181, P182, <b>N226</b> , D228                                                      |      |                                                                                                        |
| F12      | A260, Q261, K294                                                                                          |      |                                                                                                        |
| F13      | K14, E15, L16, I119, N120                                                                                 |      |                                                                                                        |
| F14      | <b>G236</b> , K237, E238, A269, S272                                                                      |      |                                                                                                        |

### 2.3. DHQS

#### 2.3.1. Conservation analysis by ConSurf

**Table S6.** Highly conserved residues (conservation score 9), conserved residues (conservation score 8) and variable residues (conservation scores 1–3) of DHQS from *A. baumannii* (PDB: 5EKS) identified by ConSurf server [37]. Residues in bold print show no variation.

| Residue classification          | Residues                                                                                                                                                                                                                                                                                                                                                                                                                                                                                                                                                                                                                                    |
|---------------------------------|---------------------------------------------------------------------------------------------------------------------------------------------------------------------------------------------------------------------------------------------------------------------------------------------------------------------------------------------------------------------------------------------------------------------------------------------------------------------------------------------------------------------------------------------------------------------------------------------------------------------------------------------|
| Highly conserved<br>(Score = 9) | <b>Y13</b> , N41, G71, E72, <b>K75</b> , R94, <b>G102</b> , <b>G103</b> , <b>G104</b> , V105, <b>D108</b> , F112, S114, <b>R119</b> , G120, <b>P127</b> , <b>T128</b> , T129, L130, L131, Q133, V134, <b>D135</b> , S136, S137, <b>G139</b> , G140, <b>K141</b> , T142, N145, K150, <b>N151</b> , <b>G154</b> , F156, <b>P159</b> , V162, D165, L172, G180, <b>E183</b> , <b>K186</b> , <b>K225</b> , V229, <b>D232</b> , E235, <b>R239</b> , <b>L242</b> , <b>N243</b> , <b>G245</b> , <b>H246</b> , T247, <b>H250</b> , A251, <b>E253</b> , <b>H263</b> , <b>G264</b> , A266, V267, <b>G270</b> , <b>D320</b> , <b>K321</b> , <b>K322</b> |
| Conserved<br>(Score = 8)        | V6, I15, I17, V44, Y48, D70, C96, A100, G107, M109, G111, A113, A115, C116, F117, Q118, V121, F123, Q125, S132, V138, G143, I144, H146, G149, M152, L153, A155, Q158, L169, T171, E176, A179, A182, Y187, A188, L190, D192, F195, L199, V218, A226, I228, E233, A240, L244, F248, G249, I252, L262, E265, A268, T269, M271, A274, A275, S278, I296, L301, P302, M317, V331, G337, I354                                                                                                                                                                                                                                                      |
| Variable<br>(Score = 1-3)       | A208, R209, A223, E238, L314, Y316, S285, Q335, H5, E7, G9, F16, Q20, P23, K24, Q25, L26, E28, P29, I31, H32, G33, Q34, P46, S50, H51, Q53, E54, A55, E57, S58, L59, K61, T62, A64, T65, Q78, L82, A90, Y122, A167, N170, E174, E193, D194, V197, E201, M203, D204, G205, V207, D210, A211, D212, L213, A215, Y219, R227, R280, N286, E287, A290, K293, K294, Q297, S304, Q307, P309, L310, D311, D312, G315, A318, N325, Q327, K334, Q338, V340, K343, D346, V347, E348, L349, K351, Q352, L355, A356, N357, Q358, H359, G360                                                                                                              |

**Table S7.** Amino acids of DHQ and NAD binding sites of DHQS from *A. baumannii* (PDB: 5EKS), with their ConSurf scores and maximum identity.

| DHQ binding site |       |                  | NADPH binding site |       |                  |         |       |                  |
|------------------|-------|------------------|--------------------|-------|------------------|---------|-------|------------------|
| Residue          | Score | Max identity (%) | Residue            | Score | Max identity (%) | Residue | Score | Max identity (%) |
| D135             | 9     | 100              | N41                | 9     | 46.4             | T128    | 9     | 100              |
| K141             | 9     | 100              | T43                | 5     | 49               | T129    | 9     | 84.2             |
| N151             | 9     | 100              | V44                | 8     | 51.5             | L131    | 9     | 91.3             |
| K225             | 9     | 100              | L47                | 5     | 62.2             | D135    | 9     | 100              |
| R239             | 9     | 100              | Y48                | 8     | 60.7             | S136    | 9     | 68.4             |
|                  |       |                  | D70                | 8     | 68.9             | K141    | 9     | 100              |
|                  |       |                  | E72                | 9     | 98.5             | N151    | 9     | 100              |
|                  |       |                  | K75                | 9     | 100              | Q168    | 5     | 27.0             |
|                  |       |                  | G103               | 9     | 100              | T171    | 8     | 88.3             |
|                  |       |                  | G104               | 9     | 100              | L172    | 9     | 96.9             |
|                  |       |                  | V105               | 9     | 72.4             | P173    | 7     | 82.1             |
|                  |       |                  | D108               | 9     | 100              | E176    | 8     | 90.8             |

### 2.3.2. Heatmaps and binding sites detected by FTMap and Sitemap

**Table S8.** Amino acid residues and the corresponding clusters of the DHQS from *A. baumannii* (PDB: 5EKS) identified by FTMap and SiteMap. Conserved and highly conserved residues are in bold (scores 8 and 9).

| Site | Residues                                                                                                                                    | Site | Residues                                                                                                                                                                                                                                                                                                                                                   |
|------|---------------------------------------------------------------------------------------------------------------------------------------------|------|------------------------------------------------------------------------------------------------------------------------------------------------------------------------------------------------------------------------------------------------------------------------------------------------------------------------------------------------------------|
| F1   | <b>G103</b> , <b>G104</b> , <b>V105</b> , <b>T129</b> , L130, L131, S132, <b>E176</b> , A179, <b>G180</b> , L262, <b>H263</b> , <b>G264</b> | S1   | <b>N41</b> , T43, <b>V44</b> , L47, <b>Y48</b> , <b>D70</b> , <b>G71</b> , <b>E72</b> , K73, <b>K75</b> , D76, I77, Q78, <b>G102</b> , <b>G103</b> , <b>G104</b> , <b>V105</b> , I106, G107, <b>D108</b> , F123, <b>Q125</b> , <b>T128</b> , <b>T129</b> , <b>L130</b> , <b>L131</b> , S132, <b>D135</b> , <b>S136</b> , V138, <b>G139</b> , <b>G140</b> , |

| Site | Residues                                                                                                           | Site | Residues                                                                                                                                                                                                                                                                                                                                                   |
|------|--------------------------------------------------------------------------------------------------------------------|------|------------------------------------------------------------------------------------------------------------------------------------------------------------------------------------------------------------------------------------------------------------------------------------------------------------------------------------------------------------|
|      |                                                                                                                    |      | K141, T142, G143, N145, H146, P147, G149, K150, N151, G154, A155, F156, Q157, P159, Q168, L169, T171, L172, P173, E176, A179, K186, Y187, K225, R239, A240, L242, N243, H246, T247, H250, E253, S254, G257, Y258, G259, W261, L262, H263, G264, D320, K322, A240, N243, G245, H246, T247, D320, K321, K322, V323, G326, Q327, L328, R329, L330, V331, I341 |
| F2   | L131, <b>D135</b> , <b>E183</b> , <b>K186</b> , Y187, <b>K225</b> , <b>L242</b> , <b>N243</b> , <b>H246</b> , H263 | S2   |                                                                                                                                                                                                                                                                                                                                                            |
| F3   | <b>D108</b> , Q125, D135, S136, S137, V138, <b>G139</b> , <b>G140</b> , <b>K141</b> , K225                         |      |                                                                                                                                                                                                                                                                                                                                                            |
| F4   | N41, <b>D70</b> , G71, <b>E72</b> , <b>G102</b> , G103, G104, V105, I106, T129, E176                               |      |                                                                                                                                                                                                                                                                                                                                                            |
| F5   | G104, D108, L131, D135, S136, S137, V138, K141, K225                                                               |      |                                                                                                                                                                                                                                                                                                                                                            |
| F6   | E72, <b>K75</b> , G104, V105, D108, L131, S136, <b>N151</b>                                                        |      |                                                                                                                                                                                                                                                                                                                                                            |
| F7   | K75, D108, K141, <b>T142</b> , G143, N151                                                                          |      |                                                                                                                                                                                                                                                                                                                                                            |
| F9   | <b>E253</b> , Y258, G259, W261, L262, H263                                                                         |      |                                                                                                                                                                                                                                                                                                                                                            |
| F10  | K141, K225, <b>R239</b> , L242                                                                                     |      |                                                                                                                                                                                                                                                                                                                                                            |
| F8   | L47, Y48, T128, Q168, T171, L172                                                                                   |      |                                                                                                                                                                                                                                                                                                                                                            |

#### 2.4. DHQase

##### 2.4.1. Length analysis

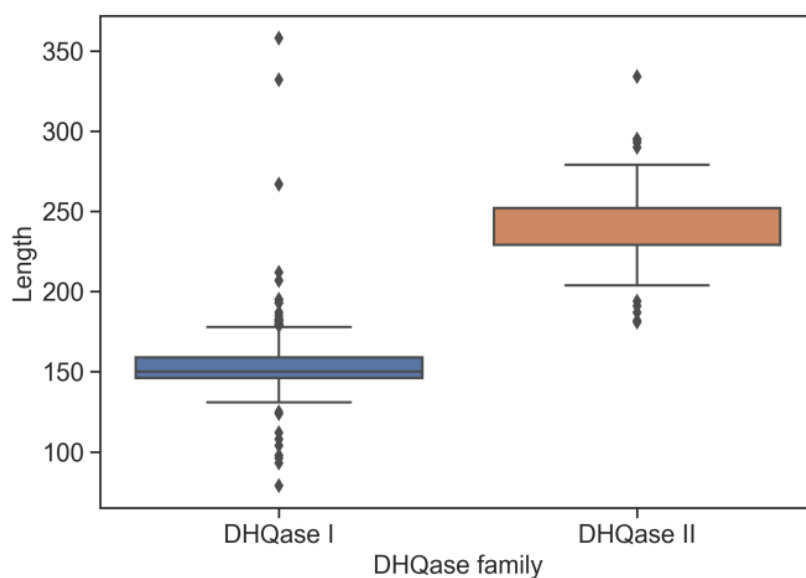

**Figure S4.** Comparison of protein lengths between type I and II DHQase counted in the number of amino acids that constitute each protein.

##### 2.4.2. Type I

- Conservation analysis by ConSurf

**Table S9.** Highly conserved residues (conservation score 9), conserved residues (conservation score 8) and variable residues (conservation scores 1–3) of the DHQase I from *S. enterica* (PDB: 4CNN) identified by the ConSurf server [37]. Residues in bold print show no variation.

| Residue classification          | Residues                                                                                                                                                                                                                                                                                                                                                                                                                                                                                |
|---------------------------------|-----------------------------------------------------------------------------------------------------------------------------------------------------------------------------------------------------------------------------------------------------------------------------------------------------------------------------------------------------------------------------------------------------------------------------------------------------------------------------------------|
| Highly conserved<br>(Score = 9) | D43, <b>E46, R48, D50</b> , T80, <b>R82</b> , E86, G87, <b>G88, D114</b> , E116, S141, <b>H143</b> ,<br>D144, F145, T148, <b>P149</b> , M161, <b>K170</b> , A172, <b>D180</b> , V181, L184, T188, <b>M205</b> ,<br><b>G209, R213, G220</b> , S221, A233, <b>G235, Q236</b>                                                                                                                                                                                                              |
| Conserved<br>(Score = 8)        | I18, V20, S21, P76, S83, Y97, D111, M154, V173, M174, P175, L185, A187,<br>T202, M203, S204, S212, T224, F225, S232, P234, L242                                                                                                                                                                                                                                                                                                                                                         |
| Variable<br>(Score = 1-3)       | L9, I10, R25, K31, E33, Y37, R38, D54, I55, S57, Q59, S60, V67, D70, D74,<br>Q90, I92, T94, Q95, H96, L98, R102, A103, A104, I105, S107, L109, V110,<br>G120, K125, A126, H134, N135, H146, A151, L156, A163, S177, H179, T186,<br>A196, D197, E208, A223, Q230, D241, S244, M247, I248, N251, A252, T3,<br>T99, D106, K2, T5, L35, A40, T41, L62, T63, A71, I75, T91, D123, D129,<br>A133, S150, H194, M15, I27, A32, A36, E39, M53, A56, T58, R66, P73, A84,<br>K85, A122, Y130, N240 |

**Table S10.** Amino acids of the DHQase I binding sites from *S. enterica* (PDB: 4CNN) identified by the ConSurf server [37] with their ConSurf scores and maximum identity.

| DHQ binding site |       |                  |
|------------------|-------|------------------|
| Residues         | Score | Max identity (%) |
| S21              | 8     | 55.7             |
| E46              | 9     | 100              |
| R48              | 9     | 100              |
| T80              | 9     | 98.4             |
| R82              | 9     | 100              |
| H143             | 9     | 100              |
| K170             | 9     | 100              |
| M203             | 8     | 59.7             |
| R213             | 9     | 100              |
| F225             | 8     | 83.9             |

- Heatmaps and binding sites detected by FTMap and Sitemap

**Table S11.** Amino acid residues and the corresponding clusters of DHQase I from *S. enterica* (PDB: 4CNN) identified by FTMap and SiteMap. Conserved and highly conserved residues are shown in bold (scores 8 and 9).

| Site | Residues                                                                                        | Site | Residues                                                                                                                                                                                                     |
|------|-------------------------------------------------------------------------------------------------|------|--------------------------------------------------------------------------------------------------------------------------------------------------------------------------------------------------------------|
| F1   | I19, <b>V20, S21</b> , M23, <b>E46, R48, R82</b> ,<br><b>K170, R213, F225, G226, A227, Q236</b> | S1   | <b>V20, S21</b> , M23, Y37, <b>E46, R48, T80, R82</b> ,<br><b>E86, G87, G88</b> , E89, <b>H143, F145, K170</b> ,<br><b>A172, I201, M203, M205, A206, R213</b> ,<br><b>F225, G226, A227, V228, G235, Q236</b> |
| F2   | <b>R48, R82, E86, G87, G88, H143</b> ,<br><b>D144, F145, A172, M205</b>                         | S2   | K2, G12, E13, G14, M15, P16, K17,<br>Q192, A196, R198, P199, V200, G216,<br>E217, <b>G220, S221, A222</b>                                                                                                    |
| F3   | <b>M205, A206, R213, G235, Q236</b>                                                             | S3   | S83, A84, K85, <b>E86</b> , T91, I92, T94, Y97,<br><b>E116, F118, T119</b>                                                                                                                                   |
| F4   | <b>S21, E46, R48, T80, R82, E86, G87</b> ,<br><b>H143, K170, A172, M203, M205</b> ,             |      |                                                                                                                                                                                                              |

| Site | Residues                                                                     | Site | Residues |
|------|------------------------------------------------------------------------------|------|----------|
|      | <b>R213, F225</b>                                                            |      |          |
| F5   | <b>V20, S21</b> , L22, M23, Y37, G226, A227,<br>V228, <b>Q236</b>            |      |          |
| F6   | Y37, R38, A40, T41, F42, M72, P73,<br>D74, I75                               |      |          |
| F7   | G12, E13, G14, M15, P16, K17, Q192,<br>G216, E217, <b>G220, S221</b> , A222  |      |          |
| F8   | K85, <b>E86, G87</b> , F118, N142, <b>H143</b> ,<br><b>D144, F145</b> , H146 |      |          |
| F9   | I11, G12, G12, G12, <b>S83</b> , I92, T94,<br><b>Y97, E116</b> , T119        |      |          |

#### 2.4.3. Type II

- Conservation analysis by ConSurf

**Table S12.** Highly conserved residues (conservation score 9), conserved residues (conservation score 8) and variable residues (conservation scores 1–3) of the DHQase II from *M. tuberculosis* (PDB: 4KIW), identified ConSurf server [37]. Residues in bold print show no variation.

| Residue classification          | Residues                                                                                                                                                                                                                                                                                                      |
|---------------------------------|---------------------------------------------------------------------------------------------------------------------------------------------------------------------------------------------------------------------------------------------------------------------------------------------------------------|
| Highly conserved<br>(Score = 9) | N9, <b>G10</b> , P11, <b>N12</b> , G14, L16, <b>G17</b> , R19, <b>Y24, G25, Q51</b> , D53, <b>E55, N75</b> ,<br>H81, S83, A85, <b>D88</b> , A89, <b>E99, H101</b> , S103, N104, <b>R108</b> , E109, F111, <b>R112</b> ,<br>S115, <b>G127</b> , G129, Y133, A136                                               |
| Conserved<br>(Score = 8)        | L13, E20, T28, S52, V72, L74, A76, G77, G78, T80, T82, V84, V100, S118,<br>A121, I125, G132                                                                                                                                                                                                                   |
| Variable<br>(Score = 1-3)       | E31, A47, A56, P71, L79, A107, L3, I4, R18, A22, T27, L43, G44, L45, V49,<br>R50, S54, Q57, W61, Q64, A66, D67, A69, E70, A91, E110, I120, T122,<br>V126, I130, L134, L135, R138, Y139, L140, A141, T146, G26, D30, A34,<br>E39, E42, K46, V48, S94, Q131, L35, E37, R38, A41, A68, E142, H143,<br>V144, G145 |

**Table S13.** Amino acids of 3-dehydroquininate binding site of DHQase II from *M. tuberculosis* (PDB: 4KIW), with their ConSurf scores and maximum identity.

| DHQase II binding site |       |                  |
|------------------------|-------|------------------|
| Residues               | Score | Max identity (%) |
| P11                    | 9     | 98,8             |
| L13                    | 8     | 92,5             |
| R19                    | 9     | 99,4             |
| N75                    | 9     | 100              |
| G77                    | 8     | 61,5             |
| G78                    | 8     | 75,2             |
| H81                    | 9     | 98,1             |
| H101                   | 9     | 100              |
| I102                   | 7     | 53,4             |
| S103                   | 9     | 98,8             |
| V105                   | 6     | 62,1             |
| R108                   | 9     | 100              |
| R112                   | 9     | 100              |

- Heatmaps and binding sites detected by FTMap and Sitemap

**Table S14.** Amino acid residues and the corresponding clusters of DHQase II from *M. tuberculosis* (PDB: 4KIW), identified by FTMap and SiteMap. Conserved and highly conserved residues are in bold (scores 8 and 9).

| Site | Residues                                                                             | Site | Residues                                                                                         |
|------|--------------------------------------------------------------------------------------|------|--------------------------------------------------------------------------------------------------|
| F1   | <b>P11, N12, L13, G14, R15, L16, G17, R18, N75, G77, G78</b>                         | S1   | <b>P11, N12, L13, R15, L16, G17, R18, N75, G77, G78, H81, H101, I102, S103, V105, R108, R112</b> |
| F2   | <b>L13, N75, G77, H101, I102, S103, V105, R108</b>                                   |      |                                                                                                  |
| F3   | <b>N75, G77, G78, T80, H81, H101, V105, R112</b>                                     |      |                                                                                                  |
| F4   | <b>P11, N12, L13, N75, G77, G78</b>                                                  |      |                                                                                                  |
| F5   | I98, T122, G123, V124, <b>I125, A136</b> , Y139                                      |      |                                                                                                  |
| F6   | <b>G14, I125</b> , L135, <b>A136</b> , R138, Y139                                    |      |                                                                                                  |
| F7   | C90, A91, L93, S94, A95, P96, L97, I120, <b>A121</b> , T122                          |      |                                                                                                  |
| F8   | H81, <b>E99</b> , H101, V105, H106, R112, R113, H114, <b>S115, S118</b> , V124, V126 |      |                                                                                                  |
| F9   | H106, V124, I125, V126, <b>G127</b> , L128                                           |      |                                                                                                  |
| F10  | I102, S103, <b>N104</b> , G127, L128, <b>G129</b>                                    |      |                                                                                                  |
| F11  | H29, V33, V49, R50, <b>Q51</b>                                                       |      |                                                                                                  |

## 2.5. SDH

### 2.5.1. Conservation analysis by ConSurf

**Table S15.** Highly conserved residues (conservation score 9), conserved residues (conservation score 8) and variable residues (conservation scores 1–3) of the SDH from *M. tuberculosis* (PDB: 4P4G), identified by the ConSurf server [37]. Residues in bold print show no variation.

| Residue classification          | Residues                                                                                                                                                                                                                                                                                                                                                                                                                                                                                            |
|---------------------------------|-----------------------------------------------------------------------------------------------------------------------------------------------------------------------------------------------------------------------------------------------------------------------------------------------------------------------------------------------------------------------------------------------------------------------------------------------------------------------------------------------------|
| Highly conserved<br>(Score = 9) | V10, G12, P14, H17, S18, S20, P21, H24, Y38, G61, S63, T65, P67, K69, A83, A89, N90, T91, N103, T104, D105, G108, G124, G126, G127, T128, S190, I192, D212, Y215, T220, <b>G236</b> , M239, Q243, A244                                                                                                                                                                                                                                                                                              |
| Conserved<br>(Score = 8)        | G9, I15, L23, L25, A27, Y28, V64, M66, A72, A76, V86, G87, S88, L92, A101, D102, I106, V109, A112, L113, S125, A129, A131, A132, G135, L136, A148, R149, N150, A154, V189, T191, P193, V196, A213, I214, L222, A223, V226, S235, L240, L241, F245, Q247, F251, T252, L265                                                                                                                                                                                                                           |
| Variable<br>(Score = 1-3)       | A46, A71, G165, P255, A264, Q22, R29, T37, G54, F75, V166, T168, A179, A198, G227, H242, D269, H34, G44, A45, E47, P49, V50, G53, P57, R74, D84, L85, P96, G111, G114, A115, A116, A117, G118, H119, T142, D143, S151, D152, A155, R156, D159, L160, T162, R163, V164, R169, F170, A172, F173, D174, S175, L178, D180, A181, V182, A183, A184, A197, G199, Y200, G202, T203, L204, A205, I207, W218, A224, S228, A229, R232, L254, R258, A260, C263, A266, A267, L268, A167, C171, G176, G177, A206 |

**Table S16.** Amino acids of the shikimate and NADPH binding sites of SDH from *M. tuberculosis* (PDB: 4P4G), with their ConSurf scores and maximum identity.

| Shikimate binding site |       |                  | NADPH binding site |       |                  |
|------------------------|-------|------------------|--------------------|-------|------------------|
| Residues               | Score | Max identity (%) | Residues           | Score | Max identity (%) |
| V10                    | 9     | 70.6             | M66                | 8     | 40               |
| S18                    | 9     | 92.6             | G124               | 9     | 99               |
| S20                    | 9     | 92.6             | S125               | 8     | 67               |
| S63                    | 9     | 72.5             | G126               | 9     | 100              |
| V64                    | 8     | 73.0             | G127               | 9     | 97               |
| T65                    | 9     | 79.9             | T128               | 9     | 65               |
| K69                    | 9     | 99.0             | A148               | 8     | 58               |
| N90                    | 9     | 99.0             | R149               | 8     | 87               |
| D105                   | 9     | 99.5             | F173               | 1     | 37               |
| Y215                   | 9     | 91.2             | S190               | 9     | 75               |
| L240                   | 8     | 79.4             | T191               | 8     | 47               |
| Q243                   | 9     | 98.0             | I192               | 9     | 78               |
| Q247                   | 8     | 47.5             | P193               | 8     | 38               |
|                        |       |                  | A194               | 6     | 29               |
|                        |       |                  | V196               | 8     | 40               |
|                        |       |                  | A197               | 1     | 19               |
|                        |       |                  | Y200               | 1     | 15               |
|                        |       |                  | D212               | 9     | 96               |
|                        |       |                  | A213               | 8     | 29               |
|                        |       |                  | I214               | 8     | 35               |
|                        |       |                  | Y215               | 9     | 91               |
|                        |       |                  | G236               | 9     | 100              |
|                        |       |                  | M239               | 9     | 93               |
|                        |       |                  | L240               | 8     | 79               |

### 2.5.2. Heatmaps and binding sites detected by FTMap and Sitemap

**Table S17.** Amino acid residues and the corresponding clusters of SDH from *M. tuberculosis* (PDB: 4P4G), identified by FTMap and SiteMap. Conserved and highly conserved residues are in bold (score 8 and 9).

| Site | Residues                                                                              | Site | Residues                                                                                                                                                                                                                                                |
|------|---------------------------------------------------------------------------------------|------|---------------------------------------------------------------------------------------------------------------------------------------------------------------------------------------------------------------------------------------------------------|
| F1   | <b>V10, H17, S18, R19, S20, S63, V64, T65, K69, N90, D105, Y215, L240, Q243, Q247</b> | S1   | <b>V10, P14, I15, H17, S18, S20, H24, Y38, S63, V64, T65, M66, P67, K69, F70, N90, D105, G124, S125, G126, G127, T128, A129, A148, R149, N150, F173, T191, I192, P193, A194, E195, A213, I214, Y215, D216, P217, G236, M239, L240, Q243, A244, Q247</b> |
| F2   | <b>H17, A213, I214, Y215, D216</b>                                                    | S2   | <b>F70, L85, V86, G87, S125, P130, D152, K153, R156, L157, L160, R163</b>                                                                                                                                                                               |
| F3   | <b>V64, T65, K69, N90, D105, T128, A213, G236, L240, Q243</b>                         | S3   | <b>R19, Y215, D216, P217, W218, L237, D269</b>                                                                                                                                                                                                          |
| F4   | <b>T65, K69, G126, G127, T128, A129, T191, I192, A213, I214</b>                       |      |                                                                                                                                                                                                                                                         |
| F5   | <b>G124, S125, G126, A148, R149, N150, T191, I192</b>                                 |      |                                                                                                                                                                                                                                                         |
| F6   | <b>D105, A213, Y215, G236, L240, Q243</b>                                             |      |                                                                                                                                                                                                                                                         |
| F7   | <b>S13, P14, H17, T65</b>                                                             |      |                                                                                                                                                                                                                                                         |

| Site | Residues                                                                                              | Site | Residues |
|------|-------------------------------------------------------------------------------------------------------|------|----------|
| F8   | <b>P67</b> , G68, K69, F70, G127                                                                      |      |          |
| F9   | F70, L85, <b>V86</b> , <b>G87</b> , <b>S125</b> , <b>G126</b> ,<br>P130, K153, R156, L157, L160, R163 |      |          |
| F10  | V60, <b>G61</b> , V93, R94, T95, Q250, <b>F251</b>                                                    |      |          |

## 2.6. SK

### 2.6.1. Analysis of length

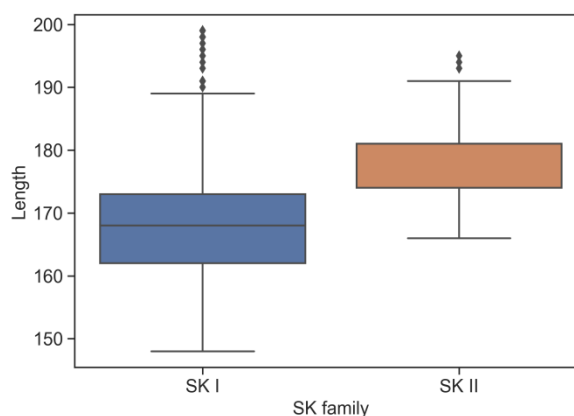

**Figure S5.** Comparison of protein lengths between type I and II SK counted in the number of amino acids that constitute each protein.

### 2.6.2. Conservation analysis by ConSurf

**Table S18.** Highly conserved residues (conservation score 9), conserved residues (conservation score 8) and variable residues (conservation scores 1–3) of SK II from *M. tuberculosis* (PDB: 2IYQ), identified by ConSurf server [37]. Residues in bold show no variation.

| Residue classification          | Residues                                                                                                                                                                              |
|---------------------------------|---------------------------------------------------------------------------------------------------------------------------------------------------------------------------------------|
| Highly conserved<br>(Score = 9) | <b>G9</b> , P11, G12, G14, <b>K15</b> , T17, D32, <b>D34</b> , G53, E54, F57, R58, E61, L78, G79, G80, G81, L100, R110, R117, P118, R136, Y140                                        |
| Conserved<br>(Score = 8)        | A5, L7, S13, S16, G19, L22, A23, T33, I37, E38, I45, I48, F49, V65, V75, S77, A82, V88, R89, L92, V97, T111, L119, L120, L132, A144, T150, I162                                       |
| Variable<br>(Score = 1-3)       | T96, P123, G94, G27, G29, L31, V35, R40, T51, Q55, R59, A70, D71, P86, A90, A91, A131, A134, M146, R152, L163, S164, R165, Q167, V168, P169, S170, P171, S172, A174, A175, E173, T176 |

**Table S19.** Amino acids of the shikimate and ATP binding site of the SK II from *M. tuberculosis* (PDB: 2IYQ) with their ConSurf scores and maximum identity.

| Shikimate binding site |       |                  | ATP binding site |       |                  |
|------------------------|-------|------------------|------------------|-------|------------------|
| Residues               | Score | Max identity (%) | Residues         | Score | Max identity (%) |
| P11                    | 9     | 58.1             | L10              | 6     | 37.8             |
| D34                    | 9     | 100              | P11              | 9     | 58.1             |
| I45                    | 8     | 60.3             | G12              | 9     | 98.3             |
| F57                    | 9     | 97.1             | S13              | 8     | 54.4             |
| R58                    | 9     | 96.7             | G14              | 9     | 99.6             |
| G79                    | 9     | 96.7             | K15              | 9     | 100              |
| G80                    | 9     | 96.3             | S16              | 8     | 49               |
| G81                    | 9     | 97.9             | T17              | 9     | 92.1             |
| P118                   | 9     | 97.1             | R110             | 9     | 97.1             |
| L119                   | 8     | 71.9             | R117             | 9     | 97.1             |
| R136                   | 9     | 98.3             | R153             | 5     | 20.2             |
|                        |       |                  | N154             | 5     | 36.9             |
|                        |       |                  | P155             | 5     | 47.1             |

### 2.6.3. Heatmaps and binding sites detected by FTMap and Sitemap

**Table S20.** Amino acid residues and the corresponding clusters of SK from *M. tuberculosis* (PDB: 2IYQ) identified by FTMap and SiteMap. Conserved and highly conserved residues are in bold (score 8 and 9).

| Site | Residues                                                                                          | Site | Residues                                                                                                                                                                                          |
|------|---------------------------------------------------------------------------------------------------|------|---------------------------------------------------------------------------------------------------------------------------------------------------------------------------------------------------|
| F1   | <b>P11, K15, D34, I45, F49, F57, R58, G79, G80, G81, V116, R117, P118, L119, L120, L132, R136</b> | S1   | <b>L10, P11, G12, S13, G14, K15, S16, T17, I18, D32, D34, E38, S44, I45, A46, F49, F57, R58, L78, G79, G80, G81, R110, V116, R117, P118, L119, L120, L132, R136, T150, R153, N154, P155, V158</b> |
| F2   | <b>K15, S16, D32, D34, V35, S77, L78, G79, R117</b>                                               |      |                                                                                                                                                                                                   |
| F3   | <b>L10, G12, S13, G14, K15, S16, T17, R117</b>                                                    |      |                                                                                                                                                                                                   |
| F4   | <b>S13, G14, T17, I18, R110, T150, R153, N154, P155, V158</b>                                     |      |                                                                                                                                                                                                   |
| F5   | <b>S16, D32, D34, V35, E38, I45, A46, V116</b>                                                    |      |                                                                                                                                                                                                   |
| F6   | <b>D34, I45, F57, R58, E61, G79, G80, G81</b>                                                     |      |                                                                                                                                                                                                   |
| F7   | <b>G12, G14, T17, R110</b>                                                                        |      |                                                                                                                                                                                                   |
| F8   | <b>L10, Y99, L100, E101, I102, M133, A137, Y140</b>                                               |      |                                                                                                                                                                                                   |
| F9   | <b>L31, A36, R40, V64, A67, A68</b>                                                               |      |                                                                                                                                                                                                   |
| F10  | <b>L30, L31, D32, T33, V35, A36, Q39</b>                                                          |      |                                                                                                                                                                                                   |

#### 2.6.4. Conservation analysis by ConSurf

**Table S21.** Highly conserved residues (conservation score 9), conserved residues (conservation score 8) and variable residues (conservation scores 1–3) of SK II from *M. tuberculosis* (PDB: 2IYQ), identified by ConSurf server [37]. Residues in bold show no variation.

| Residue classification       | Residues                                                                                                                                                                              |
|------------------------------|---------------------------------------------------------------------------------------------------------------------------------------------------------------------------------------|
| Highly conserved (Score = 9) | <b>G9</b> , P11, G12, G14, <b>K15</b> , T17, D32, <b>D34</b> , G53, E54, F57, R58, E61, L78, G79, G80, G81, L100, R110, R117, P118, R136, Y140                                        |
| Conserved (Score = 8)        | A5, L7, S13, S16, G19, L22, A23, T33, I37, E38, I45, I48, F49, V65, V75, S77, A82, V88, R89, L92, V97, T111, L119, L120, L132, A144, T150, I162                                       |
| Variable (Score = 1-3)       | T96, P123, G94, G27, G29, L31, V35, R40, T51, Q55, R59, A70, D71, P86, A90, A91, A131, A134, M146, R152, L163, S164, R165, Q167, V168, P169, S170, P171, S172, A174, A175, E173, T176 |

**Table S22.** Amino acids of the shikimate and ATP binding site of the SK II from *M. tuberculosis* (PDB: 2IYQ) with their ConSurf scores and maximum identity.

| Shikimate binding site |       |                  | ATP binding site |       |                  |
|------------------------|-------|------------------|------------------|-------|------------------|
| Residues               | Score | Max identity (%) | Residues         | Score | Max identity (%) |
| P11                    | 9     | 58.1             | L10              | 6     | 37.8             |
| D34                    | 9     | 100              | P11              | 9     | 58.1             |
| I45                    | 8     | 60.3             | G12              | 9     | 98.3             |
| F57                    | 9     | 97.1             | S13              | 8     | 54.4             |
| R58                    | 9     | 96.7             | G14              | 9     | 99.6             |
| G79                    | 9     | 96.7             | K15              | 9     | 100              |
| G80                    | 9     | 96.3             | S16              | 8     | 49               |
| G81                    | 9     | 97.9             | T17              | 9     | 92.1             |
| P118                   | 9     | 97.1             | R110             | 9     | 97.1             |
| L119                   | 8     | 71.9             | R117             | 9     | 97.1             |
| R136                   | 9     | 98.3             | R153             | 5     | 20.2             |
|                        |       |                  | N154             | 5     | 36.9             |
|                        |       |                  | P155             | 5     | 47.1             |

## 2.6.5. Heatmaps and binding sites detected by FTMap and Sitemap

**Table S23.** Amino acid residues and the corresponding clusters of SK from *M. tuberculosis* (PDB: 2IYQ) identified by FTMaps and SiteMaps. Conserved and highly conserved residues are in bold (score 8 and 9).

| Site | Residues                                                                                          | Site | Residues                                                                                                                                                                                          |
|------|---------------------------------------------------------------------------------------------------|------|---------------------------------------------------------------------------------------------------------------------------------------------------------------------------------------------------|
| F1   | <b>P11, K15, D34, I45, F49, F57, R58, G79, G80, G81, V116, R117, P118, L119, L120, L132, R136</b> | S1   | <b>L10, P11, G12, S13, G14, K15, S16, T17, I18, D32, D34, E38, S44, I45, A46, F49, F57, R58, L78, G79, G80, G81, R110, V116, R117, P118, L119, L120, L132, R136, T150, R153, N154, P155, V158</b> |
| F2   | <b>K15, S16, D32, D34, V35, S77, L78, G79, R117</b>                                               |      |                                                                                                                                                                                                   |
| F3   | <b>L10, G12, S13, G14, K15, S16, T17, R117</b>                                                    |      |                                                                                                                                                                                                   |
| F4   | <b>S13, G14, T17, I18, R110, T150, R153, N154, P155, V158</b>                                     |      |                                                                                                                                                                                                   |
| F5   | <b>S16, D32, D34, V35, E38, I45, A46, V116</b>                                                    |      |                                                                                                                                                                                                   |
| F6   | <b>D34, I45, F57, R58, E61, G79, G80, G81</b>                                                     |      |                                                                                                                                                                                                   |
| F7   | <b>G12, G14, T17, R110</b>                                                                        |      |                                                                                                                                                                                                   |
| F8   | <b>L10, Y99, L100, E101, I102, M133, A137, Y140</b>                                               |      |                                                                                                                                                                                                   |
| F9   | <b>L31, A36, R40, V64, A67, A68</b>                                                               |      |                                                                                                                                                                                                   |
| F10  | <b>L30, L31, D32, T33, V35, A36, Q39</b>                                                          |      |                                                                                                                                                                                                   |

## 2.7. EPSPS

### 2.7.1. Conservation analysis by ConSurf

**Table S24.** Highly conserved residues (conservation score 9), conserved residues (conservation score 8), and variable residues (conservation scores 1–3) of the EPSPS from *E. coli* (PDB: 2AA9) identified by the ConSurf server [37]. Residues in bold print show no variation.

| Residue classification                 | Residues                                                                                                                                                                                                                                                                                                                                                                                                                                            |
|----------------------------------------|-----------------------------------------------------------------------------------------------------------------------------------------------------------------------------------------------------------------------------------------------------------------------------------------------------------------------------------------------------------------------------------------------------------------------------------------------------|
| <b>Highly conserved</b><br>(Score = 9) | <b>S21, K22, S23, N26, R27, D49, G61, N94, A95, G96, T97, R100, M121, R124, P125, L133, P150, S169, S170, Q171, F172, T174, S197, Y200, T204, E240, D242, S244, S245, A246, S269, D273, D313, M316, N336, R338, K340, E341, R344, L352, G356, D364, D384, H385, R386, A388, M389, T412, P414</b>                                                                                                                                                    |
| <b>Conserved</b><br>(Score = 8)        | <b>P19, V24, S25, L29, A33, L45, S47, V50, M53, A56, L57, L60, G93, A98, P101, A104, L106, G117, E118, R120, I126, A132, G137, A138, L173, A175, L176, L177, M178, P199, I201, I203, M208, G212, G241, A243, S247, A252, I265, Q271, G272, M283, G284, P312, A314, I318, A319, T320, A322, A325, T329, L331, N333, I334, W337, V339, T342, D343, L345, A347, M348, E351, I368, P370, T381, M387, S392, A395, L396, I403, T409, K411, F413, Y416</b> |
| <b>Variable</b><br>(Score = 1-3)       | <b>N111, D131, R134, K261, R275, D291, E360, L374, P400, M1, E2, S3, T5, Q7, P8, I9, A10, R11, D13, N17, H36, K38, V40, T42, N55, T58, A59, S63, T65, L66, S67, A68, D69, R70, T71, C73, E74, I76, N78, G80, P81, L82, H83, A84, E85, G86, A87, L88, E89, G109, S110, D112, V114, P119, G127, L135,</b>                                                                                                                                             |

| Residue classification | Residues                                                                                                                                                                                                                                                                                                                                                                                                                                                                                            |
|------------------------|-----------------------------------------------------------------------------------------------------------------------------------------------------------------------------------------------------------------------------------------------------------------------------------------------------------------------------------------------------------------------------------------------------------------------------------------------------------------------------------------------------|
|                        | K139, T141, L143, Q145, E146, Y148, R152, Q154, G156, T158, N161, D163, P184, E185, D186, V188, R190, K192, D194, N206, K209, T210, E214, E216, N217, Q218, H219, Y220, Q221, Q222, V224, K226, G227, G228, S230, Y231, S233, G235, T236, L238, T259, R267, D278, E281, K282, T286, C288, W289, G290, Y293, S295, T297, R298, G299, E300, N302, K326, T328, T330, R332, E358, H363, R367, T369, P371, E372, K373, N375, F376, E378, A380, T399, D415, E418, A421, S424, Q425, A427, R72, R422, A426 |

**Table S25.** Amino acids of shikimate and PEP binding sites of EPSPS from *E. coli* (PDB: 2AA9) with their ConSurf [37] scores and maximum identity.

| Shikimate binding site |       |                  | PEP binding site |       |                  |
|------------------------|-------|------------------|------------------|-------|------------------|
| Residues               | Score | Max identity (%) | Residues         | Score | Max identity (%) |
| K22                    | 9     | 99.5             | K22              | 9     | 99.5             |
| S23                    | 9     | 98.5             | N94              | 9     | 70.9             |
| R27                    | 9     | 100              | A95              | 9     | 63.1             |
| T97                    | 9     | 94.2             | G96              | 9     | 98.5             |
| S170                   | 9     | 99.5             | T97              | 9     | 94.2             |
| Q171                   | 9     | 66.0             | R124             | 9     | 100              |
| Y200                   | 9     | 56.1             | Q171             | 9     | 66.0             |
| D313                   | 9     | 76.6             | D313             | 9     | 76.6             |
| K340                   | 9     | 75.7             | E341             | 9     | 99.0             |
|                        |       |                  | R344             | 9     | 99.0             |
|                        |       |                  | H385             | 9     | 99.5             |
|                        |       |                  | R386             | 9     | 99.5             |
|                        |       |                  | K411             | 8     | 64.6             |

#### 2.7.2. Heatmaps and binding sites detected by FTMap and Sitemap

**Table S26.** Amino acid residues and the corresponding clusters of EPSPS from *E. coli* (PDB: 2AA9) identified by FTMap and SiteMap. Conserved and highly conserved residues are in bold (score 8 and 9).

| Site | Residues                                                                                                                              | Site | Residues                                                                                                                                                                                                                                                                                                                                                         |
|------|---------------------------------------------------------------------------------------------------------------------------------------|------|------------------------------------------------------------------------------------------------------------------------------------------------------------------------------------------------------------------------------------------------------------------------------------------------------------------------------------------------------------------|
| F1   | N17, <b>P19</b> , G20, <b>L45</b> , D46, D69, T71, <b>F413</b> , <b>P414</b> , D415, Q419                                             | S1   | <b>K22</b> , <b>R27</b> , <b>D49</b> , <b>N94</b> , <b>A95</b> , <b>G96</b> , <b>T97</b> , <b>R100</b> , <b>R124</b> , <b>P125</b> , V168, <b>S169</b> , <b>S170</b> , <b>Q171</b> , V196, <b>S197</b> , <b>Y200</b> , <b>P312</b> , <b>D313</b> , <b>N336</b> , <b>V339</b> , <b>K340</b> , <b>E341</b> , <b>R344</b> , <b>H385</b> , <b>R386</b> , <b>K411</b> |
| F2   | L18, <b>P19</b> , G20, N43, L44, <b>L45</b> , D46, T71                                                                                | S2   | D48, <b>D49</b> , H52, <b>G93</b> , <b>N94</b> , <b>A95</b> , <b>E118</b> , P119, <b>R120</b> , <b>E341</b> , <b>T342</b> , Y382, N383, <b>D384</b> , <b>H385</b> , D405, C408, <b>K411</b>                                                                                                                                                                      |
| F3   | <b>S21</b> , <b>K22</b> , <b>S23</b> , <b>V24</b> , <b>Y200</b> , <b>D242</b> , <b>A243</b> , <b>S244</b> , <b>Q271</b> , <b>D273</b> | S3   | N17, L18, N43, L238, V239, <b>E240</b> , T263, G264, <b>I265</b> , G266, N268, <b>S269</b> , D291, D292                                                                                                                                                                                                                                                          |
| F4   | V168, <b>S169</b> , <b>S170</b> , <b>Q171</b> , V196, <b>S197</b> , <b>Y200</b> , <b>P312</b> , <b>N336</b> , <b>K340</b>             | S4   | N17, <b>P19</b> , G20, N43, L44, <b>L45</b> , D46, T71, <b>F413</b> , <b>P414</b> , D415, Q419                                                                                                                                                                                                                                                                   |
| F5   | <b>K22</b> , <b>S23</b> , <b>R27</b> , <b>T97</b> , <b>Q171</b> , <b>Y200</b> , <b>D313</b> , K340                                    | S5   | K256, L323, F324, P371, E372, K373, L374, S397, D398, T399                                                                                                                                                                                                                                                                                                       |
| F6   | <b>K22</b> , <b>D49</b> , <b>N94</b> , <b>A95</b> , <b>G96</b> , T97, <b>R124</b> , <b>Q171</b> , <b>E341</b> , <b>K411</b>           |      |                                                                                                                                                                                                                                                                                                                                                                  |
| F7   | <b>K22</b> , D48, <b>D49</b> , H52, <b>G93</b> , <b>N94</b> , <b>A95</b> ,                                                            |      |                                                                                                                                                                                                                                                                                                                                                                  |

| Site | Residues                                                                                                                                                 | Site | Residues                                                         |
|------|----------------------------------------------------------------------------------------------------------------------------------------------------------|------|------------------------------------------------------------------|
| F8   | <b>G96, T97, E118, R124, Q171, E341,</b><br>N383, <b>D384, H385,</b> C408, A410, <b>K411</b><br>L323, F324, <b>A325, P370,</b> P371, E372,<br>K373, L374 | F9   | <b>P199,</b> D202, <b>S269,</b> Q271, <b>G272,</b> I274,<br>R275 |
| F10  | L238, <b>E240, G241,</b> G264, <b>I265,</b> G266,<br>N268, S269, D291, D292                                                                              | F11  | N206, L207, T210, Y237, L238, V239,<br>E240                      |
| F12  | <b>R120,</b> E123, <b>P125, I126,</b> G127, H128,<br>L129, N147, Y148, V168, <b>F172, V339</b>                                                           | F13  | <b>R120,</b> E123, <b>P125,</b> Y148, V339                       |

## 2.8. CS

### 2.8.1. Conservation analysis by ConSurf

**Table S27.** Highly conserved residues (conservation score 9), conserved residues (conservation score 8), and variable residues (conservation scores 1–3) of CS from *M. tuberculosis* (PDB: 2QHF) identified by the ConSurf server [37]. Residues in bold show no variation.

| Residue classification          | Residues                                                                                                                                                                                                                                                                                                                                                                                                                                                                                                                                                                                                                                                                                           |
|---------------------------------|----------------------------------------------------------------------------------------------------------------------------------------------------------------------------------------------------------------------------------------------------------------------------------------------------------------------------------------------------------------------------------------------------------------------------------------------------------------------------------------------------------------------------------------------------------------------------------------------------------------------------------------------------------------------------------------------------|
| Highly conserved<br>(Score = 9) | T6, <b>G8,</b> E9, <b>S10, H11,</b> G12, E20, R39, <b>R40,</b> G43, G45, R49, <b>E53, D55, G62,</b><br>T68, G70, <b>P72,</b> N79, <b>W85,</b> M89, <b>R112, P113, H115,</b> A116, <b>D117,</b> G120,<br>K123, D128, R130, L133, E134, R135, <b>S137,</b> A138, <b>R139,</b> E140, T141, R144,<br>V145, A146, A151, L155, T218, <b>G220,</b> G221, G233, <b>G235,</b> R243, L244,<br>D245, A249, M253, Q256, A257, I258, <b>K259,</b> V261, E262, <b>G264,</b> G266,<br>G274, S275, H278, D279, R290, N293, <b>G296, G297,</b> E299, G300, <b>G301,</b><br>M302, T303, G305, <b>K315,</b> P316, I317, T319, V320, L324, Q340, <b>R341,</b> S342,<br><b>D343,</b> A346, A349, A350, V353, E355, A359 |
| Conserved<br>(Score = 8)        | L2, W4, I5, A7, A14, L15, V16, G21, V23, A24, G25, L37, R41, Y44, R46,<br>M50, T51, F52, V57, V59, S61, R64, H65, G66, L69, G71, I73, I77, E81, W82,<br>K84, R104, P111, G114, P131, V132, A136, A142, A143, A147, G148, T149,<br>R152, V167, G171, S192, V194, R195, D198, M205, I209, K213, D217, E224,<br>P231, S236, F237, S239, S246, L248, A251, G254, I255, G260, I263, F267,<br>A277, G287, T292, A295, N304, Q306, A313, M314, S318, T326, I338, V344,<br>C345, V347, P348, G351, V352, V354, M357, V361, A363                                                                                                                                                                            |
| Variable<br>(Score = 1-3)       | A325, V389, L186, D215, R13, H27, D35, S67, T87, A91, P96, A97, R156,<br>E162, A172, A174, Y176, E177, G178, P179, P181, R182, A183, E184, P187,<br>A188, A191, K199, A200, A203, D204, A207, A211, L228, Q268, R271,<br>Y282, P283, G284, P285, D286, V289, S291, P307, A330, L375, A376, Q379,<br>R380, I382, A383, A384, Q386, R387, S388, A390, D391, E393, A394, P395,<br>A396, A397, R398, G401, P180, V399, S400                                                                                                                                                                                                                                                                            |

**Table S28.** Amino acids of EPSP binding site of CS from *M. tuberculosis* (PDB: 2QHF) active and binding sites with their ConSurf [37] scores and maximum identity.

| EPSP binding site |       |                  | FMN binding site |       |                  |
|-------------------|-------|------------------|------------------|-------|------------------|
| Residues          | Score | Max identity (%) | Residues         | Score | Max identity (%) |
| H11               | 9     | 100              | R46              | 8     | 81,6             |
| R40               | 9     | 100              | R49              | 9     | 57               |
| R46               | 8     | 81,6             | G114             | 8     | 90,8             |
| R49               | 9     | 57               | H115             | 9     | 100              |
| R112              | 9     | 100              | A116             | 9     | 97,6             |
| S137              | 9     | 100              | A136             | 8     | 68,6             |
| A138              | 9     | 95,7             | A138             | 9     | 95,7             |
| R139              | 9     | 100              | I255             | 8     | 87,9             |
| I317              | 9     | 55,1             | Q256             | 9     | 70               |
| Q340              | 9     | 58,5             | A257             | 9     | 95,2             |
| R341              | 9     | 100              | M314             | 8     | 41,1             |
|                   |       |                  | K315             | 9     | 100              |
|                   |       |                  | I317             | 9     | 55,1             |
|                   |       |                  | S318             | 8     | 64,7             |
|                   |       |                  | T319             | 9     | 56,5             |
|                   |       |                  | R341             | 9     | 100              |
|                   |       |                  | S342             | 9     | 58,5             |
|                   |       |                  | D343             | 9     | 100              |

## 2.8.2. Heatmaps and binding site analysis

**Table S29.** Amino acid residues and the corresponding clusters of the CS from *M. tuberculosis* (PDB: 2QHF) identified by FTMap and SiteMap. Conserved and highly conserved residues are in bold (scores 8 and 9).

| Site | Residues                                                                                                                                                                                                                               | Site | Residues                                                                                                                                                                                                                                                                                                                                                         |
|------|----------------------------------------------------------------------------------------------------------------------------------------------------------------------------------------------------------------------------------------|------|------------------------------------------------------------------------------------------------------------------------------------------------------------------------------------------------------------------------------------------------------------------------------------------------------------------------------------------------------------------|
| F1   | N17, <b>P19</b> , G20, <b>L45</b> , D46, D69, T71, <b>F413</b> , <b>P414</b> , D415, Q419                                                                                                                                              | S1   | <b>K22</b> , <b>R27</b> , <b>D49</b> , <b>N94</b> , <b>A95</b> , <b>G96</b> , <b>T97</b> , <b>R100</b> , <b>R124</b> , <b>P125</b> , V168, <b>S169</b> , <b>S170</b> , <b>Q171</b> , V196, <b>S197</b> , <b>Y200</b> , <b>P312</b> , <b>D313</b> , <b>N336</b> , <b>V339</b> , <b>K340</b> , <b>E341</b> , <b>R344</b> , <b>H385</b> , <b>R386</b> , <b>K411</b> |
| F2   | L18, <b>P19</b> , G20, N43, L44, <b>L45</b> , D46, T71                                                                                                                                                                                 | S2   | D48, <b>D49</b> , H52, <b>G93</b> , <b>N94</b> , <b>A95</b> , <b>E118</b> , P119, <b>R120</b> , <b>E341</b> , <b>T342</b> , Y382, N383, <b>D384</b> , <b>H385</b> , D405, C408, <b>K411</b>                                                                                                                                                                      |
| F3   | <b>S21</b> , <b>K22</b> , <b>S23</b> , <b>V24</b> , <b>Y200</b> , <b>D242</b> , <b>A243</b> , <b>S244</b> , <b>Q271</b> , <b>D273</b>                                                                                                  | S3   | N17, L18, N43, L238, V239, <b>E240</b> , T263, G264, <b>I265</b> , G266, N268, <b>S269</b> , D291, D292                                                                                                                                                                                                                                                          |
| F4   | V168, <b>S169</b> , <b>S170</b> , <b>Q171</b> , V196, <b>S197</b> , Y200, <b>P312</b> , <b>N336</b> , <b>K340</b>                                                                                                                      | S4   | N17, <b>P19</b> , G20, N43, L44, <b>L45</b> , D46, T71, <b>F413</b> , <b>P414</b> , D415, Q419                                                                                                                                                                                                                                                                   |
| F5   | <b>K22</b> , <b>S23</b> , <b>R27</b> , <b>T97</b> , <b>Q171</b> , <b>Y200</b> , <b>D313</b> , <b>K340</b>                                                                                                                              | S5   | K256, L323, F324, P371, E372, K373, L374, S397, D398, T399                                                                                                                                                                                                                                                                                                       |
| F6   | <b>K22</b> , <b>D49</b> , <b>N94</b> , <b>A95</b> , <b>G96</b> , <b>T97</b> , <b>R124</b> , <b>Q171</b> , <b>E341</b> , <b>K411</b>                                                                                                    |      |                                                                                                                                                                                                                                                                                                                                                                  |
| F7   | <b>K22</b> , <b>D48</b> , <b>D49</b> , <b>H52</b> , <b>G93</b> , <b>N94</b> , <b>A95</b> , <b>G96</b> , <b>T97</b> , <b>E118</b> , <b>R124</b> , <b>Q171</b> , <b>E341</b> , N383, <b>D384</b> , <b>H385</b> , C408, A410, <b>K411</b> |      |                                                                                                                                                                                                                                                                                                                                                                  |
| F8   | L323, F324, <b>A325</b> , <b>P370</b> , P371, E372, K373, L374                                                                                                                                                                         |      |                                                                                                                                                                                                                                                                                                                                                                  |

| Site | Residues                                                                                                            | Site | Residues |
|------|---------------------------------------------------------------------------------------------------------------------|------|----------|
| F9   | <b>P199</b> , D202, <b>S269</b> , Q271, <b>G272</b> ,<br>I274, R275                                                 |      |          |
| F10  | L238, <b>E240</b> , <b>G241</b> , G264, <b>I265</b> ,<br>G266, N268, S269, D291, D292                               |      |          |
| F11  | N206, L207, T210, Y237, L238,<br>V239, E240                                                                         |      |          |
| F12  | <b>R120</b> , E123, <b>P125</b> , <b>I126</b> , G127,<br>H128, L129, N147, Y148, V168,<br><b>F172</b> , <b>V339</b> |      |          |
| F13  | <b>R120</b> , E123, <b>P125</b> , Y148, V339                                                                        |      |          |

## 2.9. *Druggability analyses*

### 2.9.1. Data

**Table S30.** Druggabilities and important physicochemical characteristics of the detected binding sites.

| Enzyme | PDB ID | Site | Dscore | SiteScore | Volume | Exposure | Enclosure | Contact | Phobic | Philic | Balance | Don/Acc | SBS |
|--------|--------|------|--------|-----------|--------|----------|-----------|---------|--------|--------|---------|---------|-----|
| DAHPS  | 1GG1   | 1    | 0.799  | 0.873     | 176.0  | 0.465    | 0.799     | 1.012   | 0.975  | 1.137  | 0.857   | 3.144   | No  |
| DAHPS  | 1GG1   | 2    | 0.599  | 0.921     | 138.7  | 0.400    | 0.849     | 1.142   | 0.151  | 1.902  | 0.08    | 0.364   | Yes |
| DAHPS  | 1GG1   | 3    | 0.803  | 0.811     | 133.9  | 0.608    | 0.711     | 0.848   | 1.701  | 0.668  | 2.545   | 0.254   | No  |
| DAHPS  | 1GG1   | 4    | 0.520  | 0.640     | 106.9  | 0.716    | 0.627     | 0.925   | 0.383  | 1.215  | 0.315   | 2.856   | No  |
| DAHPS  | 1GG1   | 5    | 0.456  | 0.599     | 69.6   | 0.603    | 0.669     | 0.996   | 0.426  | 1.218  | 0.35    | 2.041   | No  |
| DAHPS  | 1GG1   | 6    | 0.839  | 0.906     | 46.3   | 0.431    | 0.998     | 1.485   | 4.135  | 0.815  | 5.074   | 1.17    | No  |
| DAHPS  | 1RZM   | 1    | 0.770  | 1.058     | 282.2  | 0.43     | 0.784     | 1.123   | 0.19   | 1.964  | 0.097   | 0.372   | Yes |
| DAHPS  | 1RZM   | 2    | 0.662  | 0.703     | 88.8   | 0.653    | 0.709     | 0.922   | 1.609  | 0.718  | 2.242   | 2.613   | No  |
| DAHPS  | 4UC5   | 1    | 0.915  | 1.026     | 332.5  | 0.556    | 0.737     | 0.943   | 0.425  | 1.435  | 0.296   | 0.599   | Yes |
| DAHPS  | 4UC5   | 2    | 1.005  | 0.982     | 205.8  | 0.558    | 0.693     | 0.933   | 1.341  | 0.943  | 1.422   | 0.847   | No  |
| DAHPS  | 4UC5   | 3    | 0.621  | 0.665     | 75.8   | 0.617    | 0.584     | 0.837   | 0.594  | 1.017  | 0.584   | 0.416   | No  |
| DAHPS  | 4UC5   | 4    | 0.594  | 0.637     | 85.7   | 0.708    | 0.582     | 0.794   | 0.555  | 0.906  | 0.613   | 0.632   | No  |
| DAHPS  | 4UC5   | 5    | 0.624  | 0.649     | 90.1   | 0.746    | 0.550     | 0.631   | 0.599  | 0.827  | 0.724   | 0.656   | No  |
| DAHPS  | 5E40   | 1    | 0.943  | 1.030     | 569.1  | 0.602    | 0.743     | 0.936   | 0.411  | 1.358  | 0.303   | 0.58    | Yes |
| DAHPS  | 5E40   | 2    | 1.091  | 1.042     | 474.4  | 0.592    | 0.696     | 0.929   | 1.515  | 0.818  | 1.853   | 1.121   | No  |
| DAHPS  | 5E40   | 3    | 0.923  | 0.989     | 364.6  | 0.574    | 0.682     | 0.97    | 0.388  | 1.305  | 0.297   | 1.464   | No  |
| DAHPS  | 5E40   | 4    | 0.940  | 0.962     | 300.9  | 0.591    | 0.641     | 0.83    | 0.385  | 1.18   | 0.326   | 1.073   | No  |
| DAHPS  | 5E40   | 5    | 0.931  | 0.890     | 203.4  | 0.604    | 0.624     | 0.8     | 1.393  | 0.618  | 2.256   | 0.869   | No  |
| DAHPS  | 5E40   | 6    | 0.516  | 0.640     | 65.6   | 0.654    | 0.598     | 0.823   | 0.028  | 1.25   | 0.023   | 0.719   | No  |
| DAHPS  | 5E40   | 7    | 0.717  | 0.908     | 66.0   | 0.410    | 0.999     | 1.346   | 1.978  | 1.367  | 1.447   | 1.026   | No  |
| DAHPS  | 5E40   | 8    | 0.537  | 0.627     | 96.0   | 0.656    | 0.626     | 0.899   | 0.369  | 1.109  | 0.333   | 0.457   | No  |
| DAHPS  | 5E40   | 9    | 0.664  | 0.672     | 100.6  | 0.795    | 0.601     | 0.656   | 0.847  | 0.541  | 1.566   | 1.053   | No  |
| DAHPS  | 5HUD   | 1    | 0.894  | 1.049     | 285.6  | 0.510    | 0.772     | 1.006   | 0.358  | 1.56   | 0.23    | 0.523   | Yes |
| DAHPS  | 5HUD   | 2    | 0.932  | 0.909     | 262.5  | 0.711    | 0.616     | 0.767   | 0.464  | 0.95   | 0.489   | 1.456   | No  |
| DAHPS  | 5HUD   | 3    | 1.001  | 0.970     | 194.9  | 0.556    | 0.736     | 0.959   | 2.028  | 0.663  | 3.057   | 0.905   | No  |
| DAHPS  | 5HUD   | 4    | 0.901  | 0.874     | 183.9  | 0.702    | 0.633     | 0.796   | 1.066  | 0.709  | 1.505   | 1.901   | No  |
| DAHPS  | 5HUD   | 5    | 0.760  | 0.866     | 196.2  | 0.668    | 0.67      | 0.913   | 0.356  | 1.332  | 0.267   | 0.497   | No  |
| DAHPS  | 5HUD   | 6    | 0.898  | 0.859     | 129.0  | 0.649    | 0.692     | 0.824   | 2.575  | 0.319  | 8.07    | 0.472   | No  |
| DAHPS  | 5HUD   | 7    | 0.639  | 0.691     | 144.6  | 0.729    | 0.673     | 0.891   | 0.819  | 0.909  | 0.902   | 1.216   | No  |
| DAHPS  | 5HUD   | 8    | 0.639  | 0.682     | 141.8  | 0.737    | 0.633     | 0.796   | 0.678  | 0.909  | 0.746   | 1.222   | No  |

| Enzyme | PDB ID | Site | Dscore | SiteScore | Volume | Exposure | Enclosure | Contact | Phobic | Philic | Balance | Don/Acc | SBS |
|--------|--------|------|--------|-----------|--------|----------|-----------|---------|--------|--------|---------|---------|-----|
| DAHPS  | 5HUD   | 9    | 0.649  | 0.841     | 60.2   | 0.526    | 0.987     | 1.559   | 2.305  | 1.325  | 1.740   | 0.655   | No  |
| DAHPS  | 5UXM   | 1    | 0.949  | 1.016     | 519.6  | 0.534    | 0.722     | 0.945   | 0.414  | 1.300  | 0.318   | 0.463   | Yes |
| DAHPS  | 5UXM   | 2    | 0.725  | 0.744     | 98.0   | 0.689    | 0.635     | 0.895   | 0.967  | 0.813  | 1.189   | 1.484   | No  |
| DAHPS  | 5UXM   | 3    | 0.563  | 0.707     | 119.5  | 0.683    | 0.671     | 0.858   | 0.053  | 1.308  | 0.041   | 0.789   | No  |
| DAHPS  | 5UXM   | 4    | 0.488  | 0.636     | 69.2   | 0.603    | 0.640     | 0.936   | 0.512  | 1.285  | 0.398   | 0.415   | No  |
| DAHPS  | 5UXM   | 5    | 0.528  | 0.581     | 102.0  | 0.812    | 0.55      | 0.704   | 0.356  | 0.946  | 0.376   | 6.093   | No  |
| DAHPS  | 5UXM   | 6    | 0.739  | 0.762     | 110.0  | 0.613    | 0.719     | 0.986   | 1.967  | 0.661  | 2.977   | 0.902   | No  |
| DAHPS  | 5UXM   | 7    | 0.539  | 0.639     | 85.1   | 0.659    | 0.654     | 0.819   | 0.474  | 1.129  | 0.42    | 0.456   | No  |
| DAHPS  | 5UXM   | 8    | 0.503  | 0.599     | 109.1  | 0.735    | 0.635     | 0.759   | 0.335  | 1.097  | 0.305   | 1.253   | No  |
| DAHPS  | 5UXM   | 9    | 0.546  | 0.849     | 56.5   | 0.364    | 0.989     | 1.353   | 1.361  | 1.672  | 0.814   | 0.81    | No  |
| DAHPS  | 5UXM   | 10   | 0.533  | 0.567     | 74.0   | 0.803    | 0.523     | 0.609   | 0.285  | 0.741  | 0.385   | 3.203   | No  |
| DHQS   | 1UJN   | 1    | 1.014  | 1.047     | 1163.6 | 0.544    | 0.769     | 1.014   | 0.664  | 1.188  | 0.559   | 0.853   | Yes |
| DHQS   | 1UJN   | 2    | 0.766  | 0.812     | 103.7  | 0.471    | 0.799     | 1.135   | 1.914  | 0.875  | 2.187   | 1.083   | No  |
| DHQS   | 1UJN   | 3    | 0.689  | 0.698     | 72.8   | 0.611    | 0.579     | 0.807   | 0.907  | 0.706  | 1.285   | 1.135   | No  |
| DHQS   | 1UJN   | 4    | 0.535  | 0.686     | 122.7  | 0.659    | 0.725     | 0.989   | 0.37   | 1.273  | 0.29    | 1.023   | No  |
| DHQS   | 1UJN   | 5    | 0.448  | 0.616     | 64.2   | 0.611    | 0.640     | 0.957   | 0.51   | 1.33   | 0.383   | 0.535   | No  |
| DHQS   | 1UJN   | 6    | 0.503  | 0.561     | 76.1   | 0.725    | 0.538     | 0.728   | 0.411  | 0.973  | 0.422   | 1.588   | No  |
| DHQS   | 1XAG   | 1    | 0.971  | 1.068     | 880.2  | 0.395    | 0.800     | 1.06    | 0.802  | 1.376  | 0.583   | 0.637   | Yes |
| DHQS   | 1XAG   | 2    | 1.062  | 0.972     | 205.0  | 0.683    | 0.594     | 0.770   | 1.912  | 0.4    | 4.777   | 2.054   | No  |
| DHQS   | 1XAG   | 3    | 0.526  | 0.585     | 101.1  | 0.832    | 0.604     | 0.793   | 0.492  | 0.85   | 0.579   | 1.408   | No  |
| DHQS   | 1XAG   | 4    | 0.605  | 0.626     | 111.3  | 0.833    | 0.576     | 0.739   | 1.037  | 0.618  | 1.676   | 0.584   | No  |
| DHQS   | 1XAG   | 5    | 0.48   | 0.565     | 49.3   | 0.638    | 0.635     | 0.979   | 0.683  | 1.019  | 0.670   | 1.341   | No  |
| DHQS   | 1XAG   | 6    | 0.556  | 0.617     | 49.3   | 0.632    | 0.658     | 0.913   | 1.488  | 0.828  | 1.798   | 0.599   | No  |
| DHQS   | 1XAH   | 1    | 0.993  | 1.056     | 839.4  | 0.459    | 0.781     | 1.015   | 0.775  | 1.275  | 0.608   | 0.74    | Yes |
| DHQS   | 1XAH   | 2    | 1.209  | 1.135     | 248.1  | 0.433    | 0.792     | 1.062   | 2.910  | 0.529  | 5.498   | 2.007   | No  |
| DHQS   | 1XAH   | 3    | 0.800  | 0.806     | 110.3  | 0.652    | 0.676     | 0.864   | 1.294  | 0.748  | 1.732   | 9.397   | No  |
| DHQS   | 1XAH   | 4    | 0.563  | 0.602     | 59.9   | 0.727    | 0.543     | 0.668   | 0.63   | 0.851  | 0.741   | 0.286   | No  |
| DHQS   | 3QBE   | 1    | 0.954  | 1.033     | 1321.9 | 0.525    | 0.747     | 0.963   | 0.350  | 1.334  | 0.263   | 0.787   | Yes |
| DHQS   | 3QBE   | 2    | 0.476  | 0.541     | 89.2   | 0.825    | 0.558     | 0.74    | 0.218  | 0.92   | 0.237   | 1.858   | No  |
| DHQS   | 5EKS   | 1    | 0.980  | 1.009     | 1126.6 | 0.579    | 0.711     | 0.919   | 0.624  | 1.186  | 0.526   | 0.736   | Yes |
| DHQS   | 5EKS   | 2    | 0.662  | 0.714     | 110.7  | 0.664    | 0.656     | 0.902   | 0.631  | 1.045  | 0.604   | 0.507   | No  |
| DHQS   | 5HVN   | 1    | 0.962  | 1.040     | 1252.7 | 0.463    | 0.758     | 0.988   | 0.634  | 1.329  | 0.477   | 0.605   | Yes |

| Enzyme    | PDB ID | Site | Dscore | SiteScore | Volume | Exposure | Enclosure | Contact | Phobic | Philic | Balance | Don/Acc | SBS |
|-----------|--------|------|--------|-----------|--------|----------|-----------|---------|--------|--------|---------|---------|-----|
| DHQS      | 5HVN   | 2    | 1.000  | 0.971     | 322.6  | 0.638    | 0.643     | 0.864   | 0.502  | 1.001  | 0.502   | 0.866   | No  |
| DHQS      | 5HVN   | 3    | 0.645  | 0.662     | 143.5  | 0.817    | 0.567     | 0.654   | 0.373  | 0.721  | 0.517   | 1.196   | No  |
| DHQS      | 5HVN   | 4    | 0.616  | 0.640     | 90.3   | 0.710    | 0.572     | 0.781   | 1.097  | 0.715  | 1.535   | 0.730   | No  |
| DHQS      | 5HVN   | 5    | 0.556  | 0.612     | 62.4   | 0.603    | 0.628     | 0.93    | 1.049  | 0.834  | 1.259   | 1.378   | No  |
| DHQS      | 5HVN   | 6    | 0.466  | 0.570     | 57.9   | 0.732    | 0.511     | 0.697   | 0.109  | 1.194  | 0.092   | 0.658   | No  |
| DHQS      | 5HVN   | 7    | 0.585  | 0.623     | 93.4   | 0.803    | 0.581     | 0.716   | 0.557  | 0.799  | 0.697   | 0.632   | No  |
| DHQase I  | 2EGZ   | 1    | 1.014  | 0.990     | 403.0  | 0.604    | 0.676     | 0.861   | 0.876  | 1.017  | 0.861   | 0.433   | Yes |
| DHQase I  | 2EGZ   | 2    | 0.349  | 0.541     | 55.5   | 0.675    | 0.549     | 0.809   | 0.237  | 1.409  | 0.168   | 0.229   | No  |
| DHQase I  | 3L9C   | 1    | 1.072  | 1.085     | 325.7  | 0.449    | 0.825     | 1.045   | 1.332  | 1.114  | 1.196   | 0.307   | Yes |
| DHQase I  | 3L9C   | 2    | 0.917  | 0.947     | 273.3  | 0.654    | 0.618     | 0.852   | 0.346  | 1.208  | 0.286   | 1.065   | No  |
| DHQase I  | 3L9C   | 3    | 0.773  | 0.771     | 97.7   | 0.608    | 0.61      | 0.855   | 1.105  | 0.729  | 1.515   | 3.303   | No  |
| DHQase I  | 3L9C   | 4    | 0.645  | 0.732     | 100.6  | 0.613    | 0.692     | 0.949   | 0.678  | 1.142  | 0.593   | 1.071   | No  |
| DHQase I  | 3L9C   | 5    | 0.599  | 0.647     | 149.2  | 0.770    | 0.597     | 0.758   | 0.271  | 0.967  | 0.280   | 2.075   | No  |
| DHQase I  | 3L9C   | 6    | 0.586  | 0.670     | 128.6  | 0.673    | 0.643     | 0.770   | 0.15   | 1.116  | 0.134   | 1.49    | No  |
| DHQase I  | 3L9C   | 7    | 0.515  | 0.568     | 104.4  | 0.828    | 0.529     | 0.688   | 0.121  | 0.974  | 0.124   | 2.083   | No  |
| DHQase I  | 3S42   | 1    | 0.683  | 0.754     | 109.1  | 0.649    | 0.675     | 0.893   | 0.352  | 1.126  | 0.313   | 1.108   | No  |
| DHQase I  | 3S42   | 2    | 0.764  | 0.964     | 86.4   | 0.391    | 0.942     | 1.236   | 0.984  | 1.489  | 0.661   | 0.247   | Yes |
| DHQase I  | 3S42   | 3    | 0.617  | 0.691     | 125.5  | 0.631    | 0.72      | 0.944   | 0.476  | 1.036  | 0.459   | 1.186   | No  |
| DHQase I  | 3S42   | 4    | 0.755  | 0.784     | 55.9   | 0.470    | 0.739     | 1.151   | 2.378  | 0.751  | 3.166   | 1.251   | No  |
| DHQase I  | 3S42   | 5    | 0.443  | 0.592     | 61.1   | 0.719    | 0.564     | 0.747   | 0.019  | 1.311  | 0.014   | 0.569   | No  |
| DHQase I  | 4CNN   | 1    | 0.984  | 0.989     | 282.6  | 0.595    | 0.715     | 0.885   | 0.427  | 1.092  | 0.391   | 0.449   | Yes |
| DHQase I  | 4CNN   | 2    | 0.937  | 0.929     | 145.8  | 0.541    | 0.713     | 0.942   | 0.631  | 0.886  | 0.712   | 1.124   | No  |
| DHQase I  | 4CNN   | 3    | 0.689  | 0.723     | 83.0   | 0.552    | 0.632     | 0.909   | 0.812  | 0.941  | 0.863   | 0.672   | No  |
| DHQase I  | 6H5G   | 1    | 0.828  | 0.923     | 118.0  | 0.568    | 0.743     | 0.96    | 0.429  | 1.29   | 0.333   | 0.634   | Yes |
| DHQase I  | 6H5G   | 2    | 0.960  | 0.934     | 131.4  | 0.564    | 0.69      | 0.880   | 1.134  | 0.756  | 1.501   | 1.196   | No  |
| DHQase I  | 6H5G   | 3    | 0.696  | 0.777     | 108.0  | 0.500    | 0.75      | 1.063   | 0.738  | 1.113  | 0.663   | 0.684   | No  |
| DHQase I  | 6SFH   | 1    | 0.974  | 1.012     | 154.6  | 0.463    | 0.796     | 1.057   | 1.425  | 1.152  | 1.238   | 0.478   | Yes |
| DHQase I  | 6SFH   | 2    | 0.771  | 0.813     | 203.0  | 0.701    | 0.617     | 0.789   | 0.242  | 1.132  | 0.214   | 0.638   | No  |
| DHQase I  | 6SFH   | 3    | 0.691  | 0.767     | 85.7   | 0.493    | 0.770     | 1.073   | 1.226  | 1.074  | 1.142   | 1.338   | No  |
| DHQase I  | 6SFH   | 4    | 0.584  | 0.658     | 116.9  | 0.706    | 0.617     | 0.782   | 0.408  | 1.098  | 0.372   | 0.357   | No  |
| DHQase I  | 6SFH   | 5    | 0.580  | 0.625     | 63.4   | 0.624    | 0.575     | 0.891   | 1.069  | 0.908  | 1.177   | 0.447   | No  |
| DHQase II | 1GQO   | 1    | 0.982  | 1.087     | 177.3  | 0.361    | 0.834     | 1.115   | 0.425  | 1.392  | 0.305   | 0.299   | Yes |

| Enzyme    | PDB ID | Site | Dscore | SiteScore | Volume | Exposure | Enclosure | Contact | Phobic | Philic | Balance | Don/Acc | SBS |
|-----------|--------|------|--------|-----------|--------|----------|-----------|---------|--------|--------|---------|---------|-----|
| DHQase II | 3LWZ   | 1    | 1.014  | 1.013     | 353.3  | 0.481    | 0.745     | 1.014   | 0.934  | 1.071  | 0.872   | 0.913   | Yes |
| DHQase II | 3LWZ   | 2    | 0.625  | 0.647     | 49.6   | 0.632    | 0.622     | 0.886   | 1.872  | 0.549  | 3.409   | 5.465   | No  |
| DHQase II | 3LWZ   | 3    | 0.569  | 0.581     | 64.4   | 0.786    | 0.513     | 0.637   | 0.701  | 0.552  | 1.269   | 6.426   | No  |
| DHQase II | 3LWZ   | 4    | 0.493  | 0.542     | 52.1   | 0.750    | 0.536     | 0.714   | 0.991  | 0.795  | 1.246   | 4.700   | No  |
| DHQase II | 4KIW   | 1    | 0.927  | 0.936     | 175.6  | 0.497    | 0.751     | 0.999   | 1.031  | 1.003  | 1.028   | 0.434   | Yes |
| DHQase II | 6HSA   | 1    | 0.683  | 0.962     | 82.0   | 0.304    | 0.925     | 1.324   | 0.458  | 1.747  | 0.262   | 0.15    | Yes |
| DHQase II | 6HSQ   | 1    | 0.980  | 1.009     | 284.0  | 0.571    | 0.711     | 0.94    | 0.242  | 1.186  | 0.204   | 0.438   | Yes |
| DHQase II | 6HSQ   | 2    | 0.514  | 0.562     | 56.9   | 0.758    | 0.595     | 0.784   | 0.663  | 0.671  | 0.989   | 0.849   | No  |
| DHQase II | 6HSQ   | 3    | 0.427  | 0.529     | 40.8   | 0.612    | 0.612     | 1.006   | 0.482  | 1.074  | 0.449   | 1.185   | No  |
| DHQase II | 6SME   | 1    | 1.032  | 1.039     | 231.5  | 0.422    | 0.795     | 1.048   | 1.399  | 1.078  | 1.298   | 0.37    | Yes |
| DHQase II | 6SME   | 2    | 0.580  | 0.614     | 72.8   | 0.652    | 0.547     | 0.78    | 0.962  | 0.833  | 1.156   | 1.797   | No  |
| SDH       | 3FBT   | 1    | 1.028  | 1.008     | 683.5  | 0.624    | 0.705     | 0.857   | 0.649  | 1.026  | 0.633   | 0.668   | Yes |
| SDH       | 3FBT   | 2    | 0.662  | 0.689     | 101.3  | 0.667    | 0.567     | 0.794   | 0.510  | 0.948  | 0.537   | 1.104   | No  |
| SDH       | 3FBT   | 3    | 0.62   | 0.764     | 101.4  | 0.505    | 0.674     | 1.052   | 0.566  | 1.359  | 0.417   | 1.636   | No  |
| SDH       | 3FBT   | 4    | 0.635  | 0.671     | 154.0  | 0.766    | 0.564     | 0.761   | 0.308  | 1.003  | 0.307   | 1.351   | No  |
| SDH       | 3FBT   | 5    | 0.541  | 0.613     | 100.9  | 0.713    | 0.637     | 0.814   | 0.29   | 1.012  | 0.287   | 1.942   | No  |
| SDH       | 3O8Q   | 1    | 1.043  | 1.032     | 535.8  | 0.522    | 0.746     | 0.961   | 0.481  | 1.057  | 0.455   | 0.525   | Yes |
| SDH       | 3O8Q   | 2    | 0.911  | 0.957     | 219.5  | 0.591    | 0.656     | 0.896   | 0.435  | 1.238  | 0.352   | 0.549   | No  |
| SDH       | 3O8Q   | 3    | 0.633  | 0.765     | 138.2  | 0.643    | 0.699     | 0.974   | 0.176  | 1.301  | 0.135   | 0.643   | No  |
| SDH       | 3O8Q   | 4    | 0.638  | 0.665     | 92.6   | 0.697    | 0.556     | 0.817   | 0.419  | 0.889  | 0.471   | 0.929   | No  |
| SDH       | 3O8Q   | 5    | 0.560  | 0.605     | 99.5   | 0.802    | 0.588     | 0.668   | 0.185  | 0.806  | 0.229   | 0.946   | No  |
| SDH       | 3O8Q   | 6    | 0.602  | 0.627     | 56.9   | 0.703    | 0.568     | 0.757   | 1.194  | 0.695  | 1.717   | 1.546   | No  |
| SDH       | 3TNL   | 1    | 1.032  | 1.028     | 895.7  | 0.556    | 0.740     | 0.978   | 0.812  | 1.079  | 0.753   | 0.682   | Yes |
| SDH       | 3TNL   | 2    | 0.935  | 0.896     | 221.4  | 0.689    | 0.599     | 0.838   | 0.901  | 0.748  | 1.204   | 1.129   | No  |
| SDH       | 3TNL   | 3    | 0.798  | 0.799     | 136.8  | 0.655    | 0.612     | 0.769   | 0.584  | 0.875  | 0.667   | 0.592   | No  |
| SDH       | 4OMU   | 1    | 0.977  | 0.981     | 700.0  | 0.627    | 0.67      | 0.850   | 0.382  | 1.118  | 0.342   | 0.739   | Yes |
| SDH       | 4OMU   | 2    | 0.945  | 0.916     | 188.9  | 0.635    | 0.628     | 0.898   | 0.992  | 0.854  | 1.162   | 0.802   | No  |
| SDH       | 4OMU   | 3    | 0.712  | 0.743     | 175.3  | 0.745    | 0.638     | 0.797   | 0.474  | 0.968  | 0.49    | 1.227   | No  |
| SDH       | 4OMU   | 4    | 0.584  | 0.620     | 72.0   | 0.729    | 0.568     | 0.728   | 0.711  | 0.807  | 0.881   | 6.336   | No  |
| SDH       | 4OMU   | 5    | 0.504  | 0.586     | 81.0   | 0.662    | 0.628     | 0.771   | 0.372  | 1.051  | 0.354   | 0.332   | No  |
| SDH       | 4OMU   | 6    | 0.518  | 0.555     | 68.8   | 0.759    | 0.53      | 0.623   | 0.406  | 0.707  | 0.574   | 0.903   | No  |
| SDH       | 4P4G   | 1    | 0.991  | 1.064     | 507.0  | 0.439    | 0.794     | 1.079   | 0.66   | 1.306  | 0.506   | 0.485   | Yes |

| Enzyme | PDB ID | Site | Dscore | SiteScore | Volume | Exposure | Enclosure | Contact | Phobic | Philic | Balance | Don/Acc | SBS |
|--------|--------|------|--------|-----------|--------|----------|-----------|---------|--------|--------|---------|---------|-----|
| SDH    | 4P4G   | 2    | 0.732  | 0.759     | 124.6  | 0.602    | 0.657     | 0.866   | 1.112  | 0.897  | 1.239   | 1.163   | No  |
| SDH    | 4P4G   | 3    | 0.459  | 0.524     | 59.9   | 0.708    | 0.556     | 0.726   | 0.452  | 0.871  | 0.519   | 1.443   | No  |
| SDH    | 4P4N   | 1    | 1.026  | 1.024     | 510.7  | 0.531    | 0.733     | 0.923   | 0.677  | 1.086  | 0.623   | 0.552   | Yes |
| SDH    | 4P4N   | 2    | 0.787  | 0.820     | 150.1  | 0.486    | 0.698     | 1.004   | 1.218  | 1.046  | 1.164   | 0.987   | No  |
| EPSPS  | 1Q36   | 1    | 0.848  | 1.188     | 216.2  | 0.376    | 0.98      | 1.233   | 0.169  | 2.086  | 0.081   | 0.198   | Yes |
| EPSPS  | 1Q36   | 2    | 0.628  | 0.696     | 129.3  | 0.701    | 0.613     | 0.804   | 0.190  | 1.116  | 0.171   | 1.276   | No  |
| EPSPS  | 1Q36   | 3    | 0.631  | 0.740     | 146.1  | 0.648    | 0.678     | 0.853   | 0.214  | 1.224  | 0.175   | 1.306   | No  |
| EPSPS  | 1Q36   | 4    | 0.638  | 0.681     | 105.3  | 0.695    | 0.661     | 0.875   | 0.915  | 0.812  | 1.127   | 1.342   | No  |
| EPSPS  | 1Q36   | 5    | 0.660  | 0.670     | 70.1   | 0.736    | 0.585     | 0.82    | 1.404  | 0.607  | 2.313   | 2.115   | No  |
| EPSPS  | 1Q36   | 6    | 0.419  | 0.578     | 102.5  | 0.777    | 0.638     | 0.864   | 0.079  | 1.272  | 0.062   | 1.247   | No  |
| EPSPS  | 1X8T   | 1    | 1.026  | 1.189     | 213.3  | 0.331    | 0.981     | 1.263   | 1.226  | 1.54   | 0.796   | 0.246   | Yes |
| EPSPS  | 1X8T   | 2    | 0.690  | 0.801     | 155.2  | 0.563    | 0.684     | 0.961   | 0.350  | 1.281  | 0.273   | 1.012   | No  |
| EPSPS  | 1X8T   | 3    | 0.505  | 0.607     | 114.4  | 0.767    | 0.606     | 0.73    | 0.02   | 1.146  | 0.017   | 1.647   | No  |
| EPSPS  | 1X8T   | 4    | 0.594  | 0.650     | 97.1   | 0.724    | 0.672     | 0.94    | 1.081  | 0.826  | 1.308   | 3.485   | No  |
| EPSPS  | 1X8T   | 5    | 0.489  | 0.549     | 63.2   | 0.800    | 0.555     | 0.665   | 0.112  | 0.905  | 0.123   | 0.889   | No  |
| EPSPS  | 2AA9   | 1    | 0.693  | 1.132     | 144.1  | 0.370    | 0.98      | 1.259   | 0.164  | 2.338  | 0.07    | 0.213   | Yes |
| EPSPS  | 2AA9   | 2    | 0.639  | 0.685     | 134.1  | 0.733    | 0.604     | 0.766   | 0.183  | 1.042  | 0.176   | 0.983   | No  |
| EPSPS  | 2AA9   | 3    | 0.665  | 0.686     | 126.9  | 0.766    | 0.586     | 0.761   | 0.486  | 0.792  | 0.613   | 2.980   | No  |
| EPSPS  | 2AA9   | 4    | 0.585  | 0.658     | 140.0  | 0.742    | 0.673     | 0.842   | 0.258  | 1.051  | 0.245   | 0.811   | No  |
| EPSPS  | 2AA9   | 5    | 0.503  | 0.591     | 93.8   | 0.788    | 0.592     | 0.74    | 0.094  | 1.1    | 0.085   | 1.828   | No  |
| EPSPS  | 2GG4   | 1    | 0.978  | 0.983     | 726.1  | 0.663    | 0.672     | 0.847   | 0.364  | 1.12   | 0.325   | 1.098   | Yes |
| EPSPS  | 2GG4   | 2    | 0.723  | 0.769     | 76.7   | 0.577    | 0.711     | 0.932   | 1.562  | 1.002  | 1.558   | 0.390   | No  |
| EPSPS  | 2GG4   | 3    | 0.513  | 0.617     | 77.0   | 0.688    | 0.620     | 0.941   | 0.146  | 1.147  | 0.127   | 2.040   | No  |
| EPSPS  | 2GG6   | 1    | 0.852  | 1.103     | 286.4  | 0.383    | 0.852     | 1.104   | 0.344  | 1.838  | 0.187   | 0.643   | Yes |
| EPSPS  | 2GG6   | 2    | 0.881  | 0.871     | 127.3  | 0.569    | 0.692     | 0.961   | 1.453  | 0.729  | 1.995   | 3.075   | No  |
| EPSPS  | 2GG6   | 3    | 0.708  | 0.840     | 132.1  | 0.482    | 0.727     | 1.133   | 0.441  | 1.344  | 0.328   | 1.372   | No  |
| EPSPS  | 2GG6   | 4    | 0.675  | 0.710     | 114.4  | 0.646    | 0.577     | 0.801   | 0.179  | 1.052  | 0.170   | 1.190   | No  |
| EPSPS  | 2GG6   | 5    | 0.706  | 0.742     | 183.8  | 0.713    | 0.632     | 0.808   | 0.283  | 1.038  | 0.273   | 1.362   | No  |
| EPSPS  | 2GG6   | 6    | 0.626  | 0.653     | 31.2   | 0.45     | 0.635     | 1.036   | 1.883  | 0.601  | 3.134   | 5.51    | No  |
| EPSPS  | 2GG6   | 7    | 0.622  | 0.627     | 66.2   | 0.763    | 0.559     | 0.595   | 0.896  | 0.475  | 1.888   | 1.525   | No  |
| EPSPS  | 3FJX   | 1    | 0.844  | 1.179     | 195.1  | 0.401    | 0.983     | 1.356   | 0.400  | 2.060  | 0.194   | 0.317   | Yes |
| EPSPS  | 3FJX   | 2    | 0.769  | 0.811     | 155.6  | 0.702    | 0.588     | 0.718   | 0.275  | 1.155  | 0.238   | 0.807   | No  |

| Enzyme | PDB ID | Site | Dscore | SiteScore | Volume | Exposure | Enclosure | Contact | Phobic | Philic | Balance | Don/Acc | SBS |
|--------|--------|------|--------|-----------|--------|----------|-----------|---------|--------|--------|---------|---------|-----|
| EPSPS  | 3FJX   | 3    | 0.608  | 0.677     | 139.3  | 0.715    | 0.644     | 0.796   | 0.202  | 1.075  | 0.188   | 1.227   | No  |
| EPSPS  | 3FJX   | 4    | 0.551  | 0.630     | 101.4  | 0.674    | 0.641     | 0.853   | 0.451  | 1.068  | 0.422   | 1.959   | No  |
| EPSPS  | 3FJX   | 5    | 0.462  | 0.557     | 96.9   | 0.809    | 0.572     | 0.708   | 0.049  | 1.108  | 0.044   | 1.277   | No  |
| SK     | 1L4U   | 1    | 0.902  | 1.043     | 422.9  | 0.462    | 0.762     | 1.068   | 0.4056 | 1.519  | 0.266   | 0.536   | Yes |
| SK     | 1VIA   | 1    | 0.966  | 1.005     | 240.4  | 0.557    | 0.786     | 0.951   | 0.678  | 1.156  | 0.586   | 0.347   | Yes |
| SK     | 1VIA   | 2    | 0.744  | 0.788     | 112.5  | 0.462    | 0.741     | 1.032   | 1.361  | 0.951  | 1.431   | 0.698   | No  |
| SK     | 1VIA   | 3    | 0.512  | 0.606     | 106.7  | 0.752    | 0.657     | 0.910   | 0.207  | 1.0789 | 0.1916  | 1.171   | No  |
| SK     | 1VIA   | 4    | 0.450  | 0.564     | 63.5   | 0.7101   | 0.600     | 0.903   | 0.208  | 0.861  | 0.241   | 1.643   | No  |
| SK     | 2IYQ   | 1    | 0.935  | 1.061     | 316.6  | 0.399    | 0.789     | 1.110   | 0.492  | 1.467  | 0.335   | 0.586   | Yes |
| SK     | 2IYV   | 1    | 0.534  | 0.709     | 96.0   | 0.704    | 0.623     | 0.856   | 0.213  | 1.444  | 0.147   | 0.427   | No  |
| SK     | 2IYV   | 2    | 0.681  | 0.665     | 73.7   | 0.791    | 0.529     | 0.667   | 0.972  | 0.436  | 2.229   | 1.288   | Yes |
| SK     | 2IYX   | 1    | 0.921  | 1.033     | 406.1  | 0.486    | 0.748     | 0.961   | 0.291  | 1.434  | 0.203   | 0.414   | Yes |
| SK     | 3VAA   | 1    | 0.953  | 0.980     | 485.3  | 0.652    | 0.667     | 0.838   | 0.282  | 1.190  | 0.237   | 0.387   | Yes |
| CS     | 1QXO   | 1    | 1.044  | 1.017     | 790.1  | 0.601    | 0.705     | 0.885   | 1.050  | 0.978  | 1.074   | 0.719   | Yes |
| CS     | 1QXO   | 2    | 1.030  | 0.978     | 331.3  | 0.723    | 0.651     | 0.724   | 0.893  | 0.713  | 1.251   | 1.231   | No  |
| CS     | 1QXO   | 3    | 0.882  | 0.869     | 255.7  | 0.724    | 0.635     | 0.765   | 0.417  | 0.858  | 0.486   | 4.331   | No  |
| CS     | 1QXO   | 4    | 0.724  | 0.908     | 147.4  | 0.500    | 0.739     | 1.063   | 0.374  | 1.553  | 0.241   | 0.507   | No  |
| CS     | 1QXO   | 5    | 0.754  | 0.760     | 150.7  | 0.715    | 0.613     | 0.767   | 0.620  | 0.793  | 0.783   | 1.432   | No  |
| CS     | 1QXO   | 6    | 0.626  | 0.711     | 216.3  | 0.673    | 0.732     | 0.889   | 0.544  | 1.084  | 0.502   | 0.767   | No  |
| CS     | 1QXO   | 7    | 0.653  | 0.676     | 131.3  | 0.793    | 0.619     | 0.710   | 0.839  | 0.689  | 1.218   | 2.552   | No  |
| CS     | 1QXO   | 8    | 0.328  | 0.611     | 60.3   | 0.569    | 0.665     | 1.057   | 0.290  | 1.660  | 0.174   | 0.592   | No  |
| CS     | 1QXO   | 9    | 0.470  | 0.544     | 50.6   | 0.658    | 0.553     | 0.808   | 0.182  | 1.045  | 0.175   | 0.931   | No  |
| CS     | 1UM0   | 1    | 0.992  | 1.005     | 1847.7 | 0.561    | 0.705     | 0.908   | 0.693  | 1.139  | 0.609   | 0.830   | Yes |
| CS     | 1UM0   | 2    | 0.975  | 1.010     | 200.6  | 0.481    | 0.724     | 0.911   | 0.597  | 1.195  | 0.499   | 1.365   | No  |
| CS     | 1UM0   | 3    | 0.927  | 0.927     | 152.5  | 0.579    | 0.708     | 0.923   | 0.971  | 0.990  | 0.981   | 1.415   | No  |
| CS     | 1UM0   | 4    | 0.828  | 0.820     | 198.7  | 0.695    | 0.636     | 0.781   | 0.819  | 0.750  | 1.092   | 0.753   | No  |
| CS     | 1UM0   | 5    | 0.768  | 0.909     | 101.4  | 0.481    | 0.956     | 1.334   | 1.356  | 1.250  | 1.084   | 0.965   | No  |
| CS     | 1UM0   | 6    | 0.631  | 0.675     | 85.4   | 0.667    | 0.609     | 0.835   | 0.501  | 0.963  | 0.521   | 0.854   | No  |
| CS     | 1UM0   | 7    | 0.663  | 0.694     | 78.9   | 0.714    | 0.629     | 0.774   | 1.341  | 0.806  | 1.665   | 0.743   | No  |
| CS     | 2G85   | 1    | 0.893  | 1.094     | 657.7  | 0.417    | 0.839     | 1.144   | 0.502  | 1.689  | 0.297   | 0.515   | Yes |
| CS     | 2G85   | 2    | 0.991  | 0.950     | 196.5  | 0.676    | 0.623     | 0.823   | 0.765  | 0.826  | 0.926   | 0.673   | No  |
| CS     | 2G85   | 3    | 0.762  | 0.771     | 198.0  | 0.754    | 0.588     | 0.720   | 0.305  | 0.942  | 0.324   | 1.189   | No  |

| Enzyme | PDB ID | Site | Dscore | SiteScore | Volume | Exposure | Enclosure | Contact | Phobic | Philic | Balance | Don/Acc | SBS |
|--------|--------|------|--------|-----------|--------|----------|-----------|---------|--------|--------|---------|---------|-----|
| CS     | 2G85   | 4    | 0.591  | 0.663     | 88.5   | 0.622    | 0.581     | 0.774   | 0.406  | 1.124  | 0.361   | 2.062   | No  |
| CS     | 2G85   | 5    | 0.608  | 0.631     | 58.9   | 0.686    | 0.571     | 0.755   | 0.629  | 0.686  | 0.917   | 1.786   | No  |
| CS     | 2G85   | 6    | 0.713  | 0.719     | 132.2  | 0.804    | 0.589     | 0.617   | 0.636  | 0.720  | 0.883   | 0.783   | No  |
| CS     | 2G85   | 7    | 0.529  | 0.624     | 97.3   | 0.690    | 0.622     | 0.898   | 0.359  | 1.127  | 0.318   | 0.792   | No  |
| CS     | 2G85   | 8    | 0.688  | 0.681     | 110.6  | 0.812    | 0.569     | 0.676   | 0.996  | 0.490  | 2.034   | 1.204   | No  |
| CS     | 2O11   | 1    | 1.017  | 1.035     | 820.8  | 0.483    | 0.751     | 0.983   | 0.914  | 1.145  | 0.798   | 0.746   | Yes |
| CS     | 2O11   | 2    | 0.813  | 0.822     | 121.6  | 0.532    | 0.655     | 0.952   | 0.956  | 0.910  | 1.051   | 0.796   | No  |
| CS     | 2O11   | 3    | 0.707  | 0.757     | 190.5  | 0.740    | 0.626     | 0.811   | 0.239  | 1.101  | 0.217   | 1.218   | No  |
| CS     | 2O11   | 4    | 0.682  | 0.698     | 120.0  | 0.795    | 0.566     | 0.713   | 0.450  | 0.843  | 0.593   | 1.262   | No  |
| CS     | 2O11   | 5    | 0.583  | 0.652     | 89.7   | 0.664    | 0.564     | 0.782   | 0.436  | 1.117  | 0.390   | 1.140   | No  |
| CS     | 2O11   | 6    | 0.612  | 0.679     | 140.6  | 0.762    | 0.629     | 0.790   | 0.338  | 1.082  | 0.312   | 0.466   | No  |
| CS     | 2O11   | 7    | 0.481  | 0.578     | 70.8   | 0.645    | 0.650     | 0.870   | 0.232  | 1.073  | 0.216   | 1.322   | No  |
| CS     | 2O12   | 1    | 1.066  | 1.062     | 643.4  | 0.476    | 0.790     | 0.998   | 1.272  | 1.069  | 1.190   | 0.546   | Yes |
| CS     | 2O12   | 2    | 0.962  | 0.947     | 111.3  | 0.489    | 0.728     | 0.960   | 2.087  | 0.799  | 2.611   | 0.282   | No  |
| CS     | 2O12   | 3    | 0.788  | 0.795     | 108.9  | 0.602    | 0.642     | 0.874   | 0.755  | 0.823  | 0.917   | 0.796   | No  |
| CS     | 2O12   | 4    | 0.649  | 0.757     | 189.8  | 0.722    | 0.663     | 0.904   | 0.252  | 1.248  | 0.202   | 1.202   | No  |
| CS     | 2O12   | 5    | 0.755  | 0.742     | 153.7  | 0.826    | 0.570     | 0.618   | 0.746  | 0.595  | 1.253   | 1.207   | No  |
| CS     | 2O12   | 6    | 0.578  | 0.619     | 87.9   | 0.702    | 0.543     | 0.692   | 0.392  | 0.957  | 0.409   | 1.556   | No  |
| CS     | 2O12   | 7    | 0.485  | 0.538     | 48.1   | 0.758    | 0.531     | 0.765   | 0.309  | 0.842  | 0.367   | 2.006   | No  |
| CS     | 2O12   | 8    | 0.624  | 0.681     | 137.8  | 0.764    | 0.633     | 0.777   | 0.424  | 1.053  | 0.403   | 0.483   | No  |
| CS     | 2QHF   | 1    | 0.930  | 1.064     | 485.3  | 0.467    | 0.794     | 1.053   | 0.510  | 1.492  | 0.342   | 0.554   | Yes |
| CS     | 2QHF   | 2    | 0.964  | 0.932     | 213.0  | 0.648    | 0.585     | 0.776   | 0.507  | 1.003  | 0.506   | 0.860   | No  |
| CS     | 2QHF   | 3    | 0.674  | 0.893     | 86.5   | 0.433    | 0.851     | 1.268   | 1.633  | 1.558  | 1.048   | 0.328   | No  |
| CS     | 2QHF   | 4    | 0.720  | 0.817     | 198.8  | 0.688    | 0.650     | 0.843   | 0.167  | 1.277  | 0.131   | 1.367   | No  |
| CS     | 2QHF   | 5    | 0.740  | 0.752     | 185.5  | 0.805    | 0.567     | 0.645   | 0.122  | 0.988  | 0.124   | 1.157   | No  |
| CS     | 2QHF   | 6    | 0.679  | 0.702     | 141.1  | 0.811    | 0.570     | 0.701   | 0.262  | 0.921  | 0.284   | 1.280   | No  |
| CS     | 2QHF   | 7    | 0.583  | 0.9359    | 62.4   | 0.410    | 0.978     | 1.403   | 0.967  | 1.902  | 0.509   | 0.293   | No  |
| CS     | 2QHF   | 8    | 0.702  | 0.708     | 100.7  | 0.728    | 0.588     | 0.709   | 1.073  | 0.684  | 1.569   | 0.917   | No  |
| CS     | 2QHF   | 9    | 0.545  | 0.652     | 134.7  | 0.779    | 0.645     | 0.796   | 0.257  | 1.172  | 0.219   | 0.449   | No  |

## 2.9.2. Graphical representation of druggability analyses

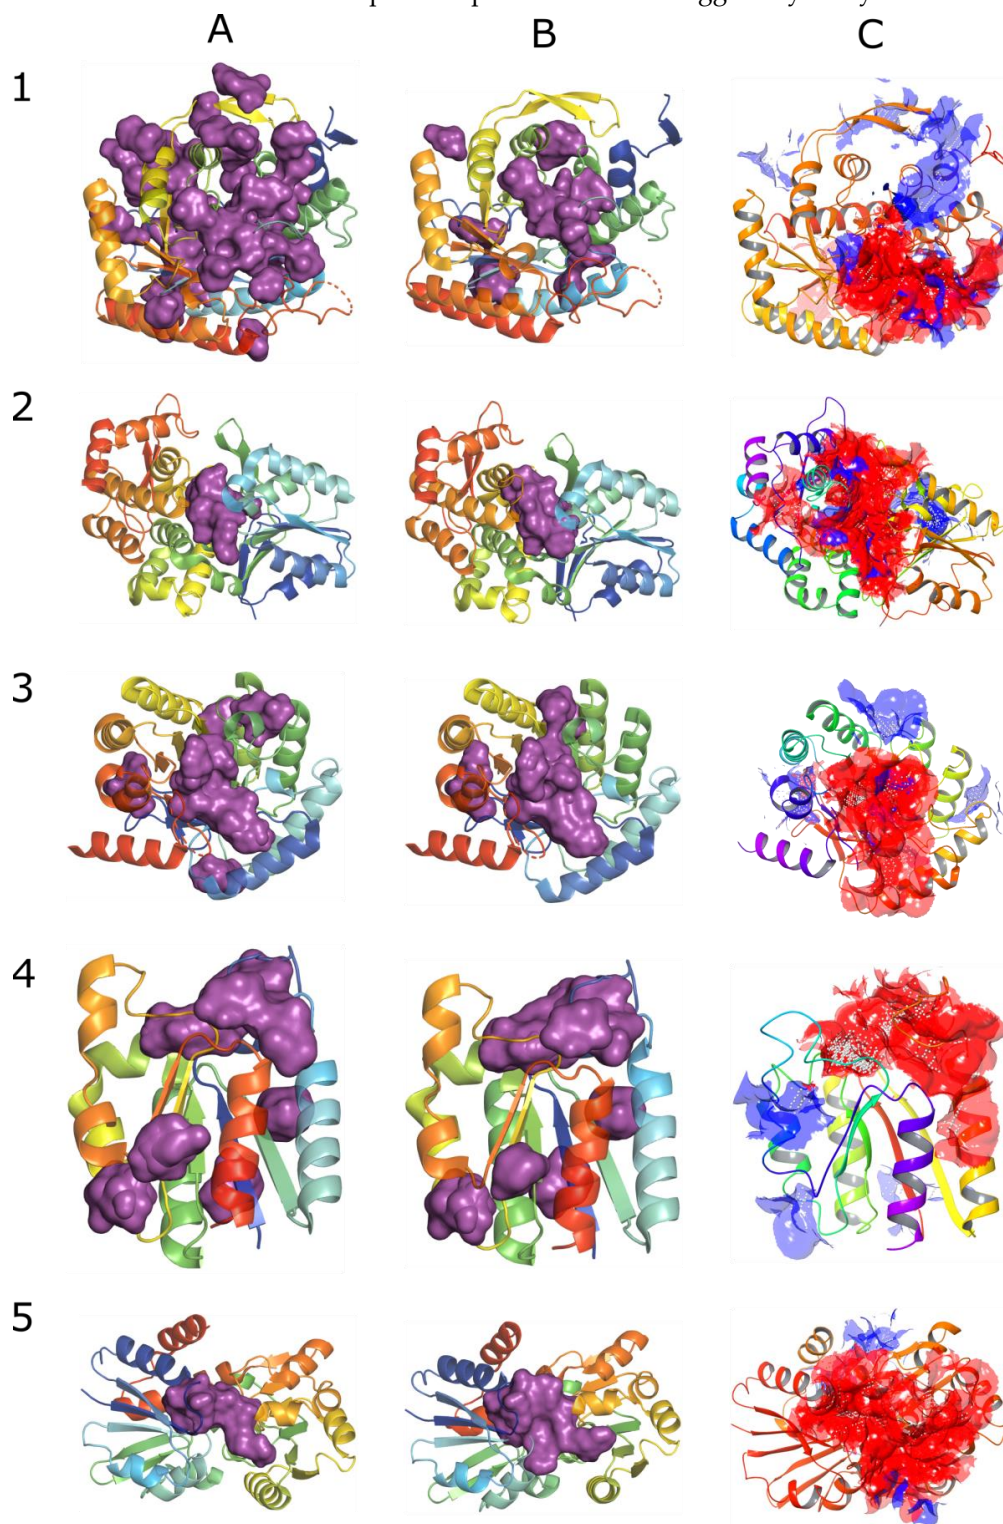

**Figure S6.** Surface representation of heatmaps and binding sites from structures of 1. DAHPS, 2. DHQS, 3. DHQase I, 4. DHQase II, identified by (a) FTMap, (b) FTSite and (c) SiteMap mapped onto X-ray structure of each enzyme in the shikimate pathway. PDB ID codes of enzymes are the same as in Figure 3 of the main manuscript. (a) tree top-ranked heatmaps are presented, (b) all binding sites are presented (c) two top-ranked binding sites are presented. Clusters in (a) and (b) are colored purple and sites in (c) are colored by their DScore in the following pattern: red(best ranked), blue(second best).

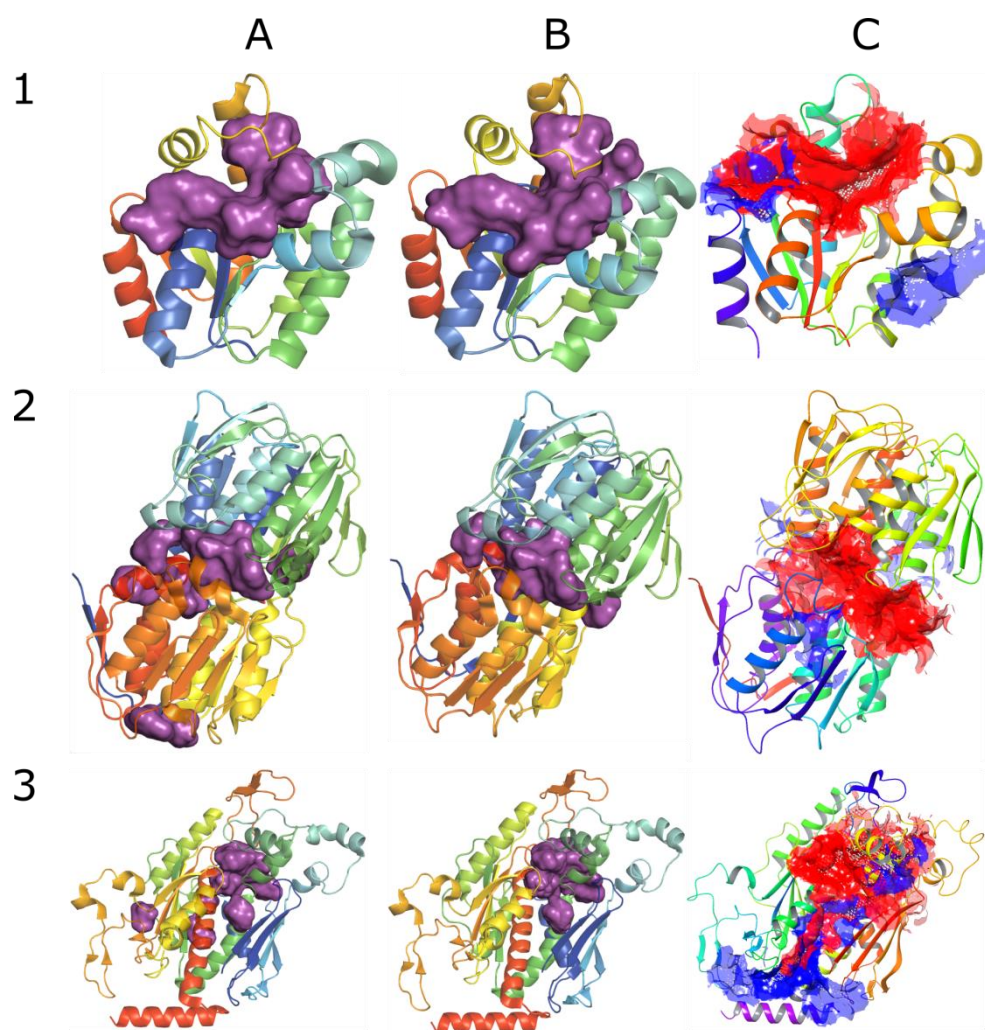

**Figure S7.** Surface representation of heatmaps and binding sites from structures of 1. SDH, 2. SK II, 3. EPSP and 4. CS identified by (a) FTMap, (b) FTSite and (c) Sitemap mapped onto X-ray structure of each enzyme in the shikimate pathway. PDB ID codes of enzymes are the same as in Figure 3 of the main manuscript. A) tree top-ranked heatmaps are presented, A) all binding sites are presented c) two top-ranked binding sites are presented. Clusters in (a) and (b) are colored purple and sites in (c) are colored by their DScore in the following pattern: red(best ranked), blue(second best).

## 2.10. Analyses of physicochemical properties

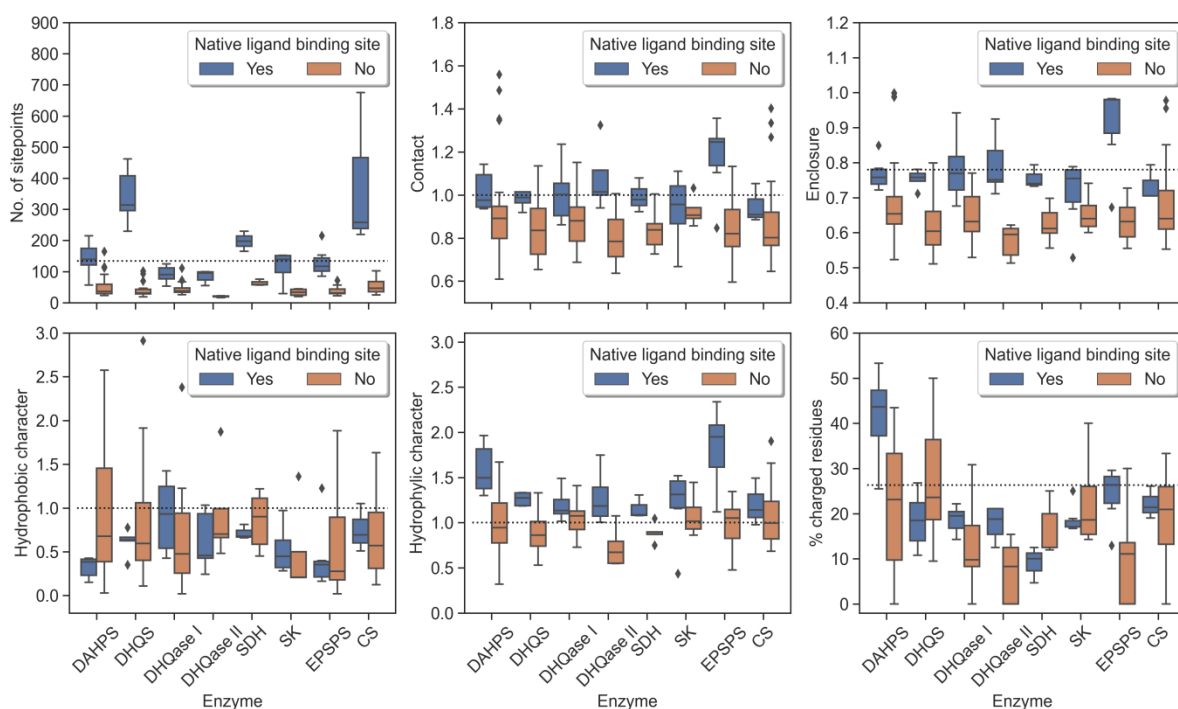

**Figure S8.** Differences in important physicochemical properties of the substrate and the allosteric binding sites for each enzyme of the shikimate pathway. A dotted line in each boxplot indicates a reference value for the average submicromolar inhibitor.

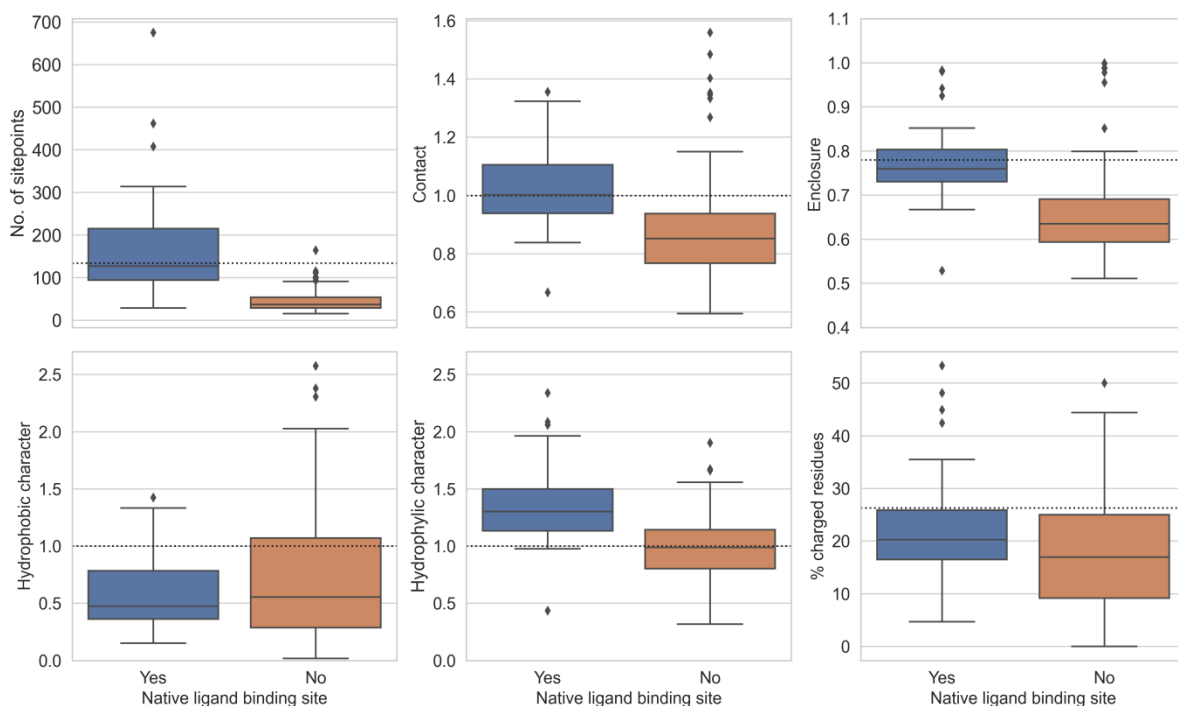

**Figure S9.** Differences in important physicochemical properties between the substrate and the allosteric binding sites. A dotted line in each boxplot indicates a reference value for the average submicromolar inhibitor.

### 3. References

1. Blanco, B.; Prado, V.; Lence, E.; Otero, J.M.; Garcia-Doval, C.; van Raaij, M.J.; Llamas-Saiz, A.L.; Lamb, H.; Hawkins, A.R.; Gonzalez-Bello, C. Mycobacterium Tuberculosis Shikimate Kinase Inhibitors: Design and Simulation Studies of the Catalytic Turnover. *J. Am. Chem. Soc.* **2013**, *135*, 12366–12376, doi:10.1021/ja405853p.
2. Balachandran, N.; Heimhalt, M.; Liuni, P.; To, F.; Wilson, D.J.; Junop, M.S.; Berti, P.J. Potent Inhibition of 3-Deoxy-D-Arabinohexulose-7-Phosphate (DAH) Synthase by DAH Oxime, a Phosphate Group Mimic. *Biochemistry* **2016**, *55*, 6617–6629, doi:10.1021/acs.biochem.6b00930.
3. Walker, S.R.; Jiao, W.; Parker, E.J. Synthesis and Evaluation of Dual Site Inhibitors of 3-Deoxy-D-Arabinohexulose-7-Phosphate Synthase. *Bioorg. Med. Chem. Lett.* **2011**, *21*, 5092–5097, doi:10.1016/j.bmcl.2011.03.071.
4. Peterson, M.L.; Corey, S.D.; Font, J.L.; Walker, M.C.; Sikorski, J.A. New Simplified Inhibitors of EPSP Synthase: The Importance of Ring Size for Recognition at the Shikimate 3-Phosphate Site. *Bioorg. Med. Chem. Lett.* **1996**, *6*, 2853–2858, doi:10.1016/S0960-894X(96)00527-6.
5. Zhu, N.; Wang, X.; Li, D.; Lin, Y.; You, X.; Jiang, J.; Xu, Y.; Jiang, W.; Si, S. IMB-T130 Targets 3-Dehydroquinate Synthase and Inhibits Mycobacterium Tuberculosis. *Sci. Rep.* **2018**, *8*, 17439, doi:10.1038/s41598-018-35701-z.
6. Montchamp, J.L.; Frost, J.W. Cyclohexenyl and Cyclohexylidene Inhibitors of 3-Dehydroquinate Synthase: Active Site Interactions Relevant to Enzyme Mechanism and Inhibitor Design. *J. Am. Chem. Soc.* **1997**, *119*, 7645–7653, doi:10.1021/ja961771z.
7. Prado, V.; Lence, E.; Maneiro, M.; Vazquez-Ucha, J.C.; Beceiro, A.; Thompson, P.; Hawkins, A.R.; Gonzalez-Bello, C. Targeting the Motion of Shikimate Kinase: Development of Competitive Inhibitors That Stabilize an Inactive Open Conformation of the Enzyme. *J. Med. Chem.* **2016**, *59*, 5471–5487, doi:10.1021/acs.jmedchem.6b00483.
8. Gonzalez-Bello, C.; Manthey, M.K.; Harris, J.H.; Hawkins, A.R.; Coggins, J.R.; Abell, C. Synthesis of 2-Bromo- and 2-Fluoro-3-Dehydroshikimic Acids and 2-Bromo- and 2-Fluoroshikimic Acids Using Synthetic and Enzymatic Approaches. *J. Org. Chem.* **1998**, *63*, 1591–1597, doi:10.1021/jo971858i.
9. Lence, E.; Tizon, L.; Otero, J.M.; Peon, A.; Prazeres, V.F.V.; Llamas-Saiz, A.L.; Fox, G.C.; van Raaij, M.J.; Lamb, H.; Hawkins, A.R.; et al. Mechanistic Basis of the Inhibition of Type II Dehydroquinase by (2S)- and (2R)-2-Benzyl-3-Dehydroquinic Acids. *ACS Chem. Biol.* **2013**, *8*, 568–577, doi:10.1021/cb300493s.
10. Thomas, M.G.; Lawson, C.; Allanson, N.M.; Leslie, B.W.; Bottomley, J.R.; McBride, A.; Olusanya, O.A. A Series of 2(Z)-2-Benzylidene-6,7-Dihydroxybenzofuran-3[2H]-Ones as Inhibitors of Chorismate Synthase. *Bioorg. Med. Chem. Lett.* **2003**, *13*, 423–426, doi:10.1016/S0960-894X(02)00957-5.
11. Peek, J.; Shi, T.; Christendat, D. Identification of Novel Polyphenolic Inhibitors of Shikimate Dehydrogenase (AroE). *J. Biomol. Screen.* **2014**, *19*, 1090–1098, doi:10.1177/1087057114527127.
12. Bentley, R. The Shikimate Pathway - A Metabolic Tree with Many Branches. *Crit. Rev. Biochem. Mol. Biol.* **1990**, *25*, 307–384, doi:10.3109/10409239009090615.
13. Gibson, F.; Pittard, J. Pathways of Biosynthesis of Aromatic Amino Acids And Vitamins And Their Control In Microorganisms. *Bacteriol. Rev.* **1968**, *32*, 465–, doi:10.1128/MMBR.32.4\_Pt\_2.465-492.1968.
14. Davis, B. Aromatic Biosynthesis .1. The Role of Shikimic Acid. *J. Biol. Chem.* **1951**, *191*, 315–325.
15. Roberts, F.; Roberts, C.W.; Johnson, J.J.; Kyle, D.E.; Krell, T.; Coggins, J.R.; Coombs, G.H.; Milhous, W.K.; Tzipori, S.; Ferguson, D.J.P.; et al. Evidence for the Shikimate Pathway in Apicomplexan Parasites (Vol 393, Pg 801, 1998). *Nature* **1998**, *395*, 306–306, doi:10.1038/26277.
16. Herrmann, K.M.; Weaver, L.M. The Shikimate Pathway. *Annu. Rev. Plant Physiol. Plant Mol. Biol.* **1999**, *50*, 473–503, doi:10.1146/annurev.arplant.50.1.473.

17. Jiao, W.; Blackmore, N.J.; Nazmi, A.R.; Parker, E.J. Quaternary Structure Is an Essential Component That Contributes to the Sophisticated Allosteric Regulation Mechanism in a Key Enzyme from Mycobacterium Tuberculosis. *Plos One* **2017**, *12*, e0180052, doi:10.1371/journal.pone.0180052.
18. Jensen, R.A.; Xie, G.; Calhoun, D.H.; Bonner, C.A. The Correct Phylogenetic Relationship of KdsA (3-Deoxy-D-Manno-Octulosonate 8-Phosphate Synthase) with One of Two Independently Evolved Classes of AroA (3-Deoxy-D-Arabino-Heptulosonate 7-Phosphate Synthase). *J. Mol. Evol.* **2002**, *54*, 416–423, doi:10.1007/s00239-001-0031-z.
19. Webby, C.J.; Baker, H.M.; Lott, J.S.; Baker, E.N.; Parker, E.J. The Structure of 3-Deoxy-D-Arabino-Heptulosonate 7-Phosphate Synthase from Mycobacterium Tuberculosis Reveals a Common Catalytic Scaffold and Ancestry for Type I and Type II Enzymes. *J. Mol. Biol.* **2005**, *354*, 927–939, doi:10.1016/j.jmb.2005.09.093.
20. Light, S.H.; Anderson, W.F. The Diversity of Allosteric Controls at the Gateway to Aromatic Amino Acid Biosynthesis. *Protein Sci.* **2013**, *22*, 395–404, doi:10.1002/pro.2233.
21. Subramaniam, P.S.; Xie, G.; Xia, T.H.; Jensen, R.A. Substrate Ambiguity of 3-Deoxy-D-Manno-Octulosonate 8-Phosphate Synthase from Neisseria Gonorrhoeae in the Context of Its Membership in a Protein Family Containing a Subset of 3-Deoxy-D-Arabino-Heptulosonate 7-Phosphate Synthases. *J. Bacteriol.* **1998**, *180*, 119–127, doi:10.1128/JB.180.1.119-127.1998.
22. Sterritt, O.W.; Kessans, S.A.; Jameson, G.B.; Parker, E.J. A Pseudoisostructural Type II DAH7PS Enzyme from Pseudomonas Aeruginosa: Alternative Evolutionary Strategies to Control Shikimate Pathway Flux. *Biochemistry* **2018**, *57*, 2667–2678, doi:10.1021/acs.biochem.8b00082.
23. Harris, J.M.; GonzalezBello, C.; Kleanthous, C.; Hawkins, A.R.; Coggins, J.R.; Abell, C. Evidence from Kinetic Isotope Studies for an Enolate Intermediate in the Mechanism of Type II Dehydroquinases. *Biochem. J.* **1996**, *319*, 333–336, doi:10.1042/bj3190333.
24. Florova, G.; Denoya, C.D.; Morgenstern, M.R.; Skinner, D.D.; Reynolds, K.A. Cloning, Expression, and Characterization of a Type II 3-Dehydroquinase Dehydratase Gene from Streptomyces Hygroscopicus. *Arch. Biochem. Biophys.* **1998**, *350*, 298–306, doi:10.1006/abbi.1997.0536.
25. Romanowski, M.J.; Burley, S.K. Crystal Structure of the Escherichia Coli Shikimate Kinase I (AroK) That Confers Sensitivity to Mecillinam. *Proteins-Struct. Funct. Genet.* **2002**, *47*, 558–562, doi:10.1002/prot.10099.
26. UniProt Consortium UniProt: The Universal Protein Knowledgebase in 2021. *Nucleic Acids Res.* **2021**, *49*, D480–D489, doi:10.1093/nar/gkaa1100.
27. KEGG: Kyoto Encyclopedia of Genes and Genomes. Available online: <http://www.kegg.jp/> (accessed on 14 October 2021).
28. Schrödinger Release 2021-3: Maestro; Schrödinger, LLC.: New York, NY, USA, 2021.
29. Kozakov, D.; Grove, L.E.; Hall, D.R.; Bohnuud, T.; Mottarella, S.; Luo, L.; Xia, B.; Beglov, D.; Vajda, S. The FTMap Family of Web Servers for Determining and Characterizing Ligand Binding Hot Spots of Proteins. *Nat. Protoc.* **2015**, *10*, 733–755, doi:10.1038/nprot.2015.043.
30. The PyMOL Molecular Graphics System, Version 2.3.3.; Schrödinger, LLC.: New York, NY, USA, 2019.
31. Gonçalves, W.R.S.; Gonçalves-Almeida, V.M.; Arruda, A.L.; Meira, W., Jr.; da Silveira, C.H.; Pires, D.E.V.; de Melo-Minardi, R.C. PDBest: A User-Friendly Platform for Manipulating and Enhancing Protein Structures. *Bioinformatics* **2015**, *31*, 2894–2896, doi:10.1093/bioinformatics/btv223.
32. KNIME: The Konstanz Information Miner | SpringerLink Available online: [https://link.springer.com/chapter/10.1007/978-3-540-78246-9\\_38](https://link.springer.com/chapter/10.1007/978-3-540-78246-9_38) (accessed on 21 June 2021).
33. Schrödinger Release 2021-3: SiteMap; Schrödinger, LLC, New York, NY., 2021.
34. Waskom, M.L. Seaborn: Statistical Data Visualization. *J. Open Source Softw.* **2021**, *6*, 3021, doi:10.21105/joss.03021.

35. Hunter, J.D. Matplotlib: A 2D Graphics Environment. *Comput. Sci. Eng.* **2007**, *9*, 90–95, doi:10.1109/MCSE.2007.55.
36. Kluyver, T.; Ragan-Kelley, B.; Perez, F.; Granger, B.; Bussonnier, M.; Frederic, J.; Kelley, K.; Hamrick, J.; Grout, J.; et al. Jupyter Notebooks – a Publishing Format for Reproducible Computational Workflows. *Position. Power Acad. Publ. Play. Agents Agendas* **2016**, 87–90, doi:10.3233/978-1-61499-649-1-87.
37. Ashkenazy, H.; Abadi, S.; Martz, E.; Chay, O.; Mayrose, I.; Pupko, T.; Ben-Tal, N. ConSurf 2016: An Improved Methodology to Estimate and Visualize Evolutionary Conservation in Macromolecules. *Nucleic Acids Res.* **2016**, *44*, W344-350, doi:10.1093/nar/gkw408.
